# Supplementary material for: An epigenome-wide association study of posttraumatic stress disorder in US veterans implicates several new DNA methylation loci
Source: Clin Epigenetics. 2020 Mar 14;12:46. doi: 10.1186/s13148-020-0820-0 (PMC7071645; doi:10.1186/s13148-020-0820-0)
Supplement: Supplementary file 2 — Additional file 2. Complete EWAS results for the Discovery Cohort. [file 13148_2020_820_MOESM2_ESM.xlsx]

## Sheet: LTPTSD-SmoSAdj-trim-4Supp-Feb_1
ID	logFC	t	P.Value	adj.P.Val	range
cg19534438	0.337358	5.37223	1.19175e-07	0.0479698	0.166632
cg20152234	0.183316	4.82838	1.82981e-06	0.279897	0.135873
cg11504264	0.23778	4.80122	2.08611e-06	0.279897	0.267312
cg08000207	-0.345589	-4.55311	6.63965e-06	0.597792	0.125357
cg05575921	-0.133674	-4.48206	9.16486e-06	0.597792	0.346634
cg25526519	-0.162365	-4.47039	9.65899e-06	0.597792	0.176616
cg09423651	-0.526686	-4.43563	1.1292e-05	0.597792	0.20542
cg04130728	0.154412	4.42432	1.18811e-05	0.597792	0.274498
cg12115116	0.252073	4.36655	1.53419e-05	0.677004	0.50454
cg20974659	0.113785	4.34565	1.68193e-05	0.677004	0.19758
cg25017774	0.150044	4.29802	2.07035e-05	0.694527	0.295558
cg11316904	0.130329	4.28007	2.23818e-05	0.694527	0.248627
cg18103582	0.119193	4.27039	2.33403e-05	0.694527	0.204722
cg12165383	-0.146147	-4.25261	2.5212e-05	0.694527	0.168961
cg17758583	0.821498	4.23048	2.77297e-05	0.694527	0.770882
cg26727817	0.15055	4.22875	2.79354e-05	0.694527	0.169205
cg12590902	0.0896577	4.21729	2.93329e-05	0.694527	0.193284
cg05774234	0.114467	4.17826	3.46438e-05	0.774705	0.216208
cg02123616	-0.105059	-4.13961	4.0811e-05	0.864583	0.125465
cg03155646	-0.431061	-4.12631	4.31751e-05	0.868934	0.19017
cg02591280	-0.115813	-4.09089	5.00478e-05	0.871452	0.105216
cg11678426	0.147289	4.08585	5.11106e-05	0.871452	0.163864
cg02742775	0.0876684	4.08254	5.18197e-05	0.871452	0.168787
cg00681376	-0.466694	-4.04608	6.02842e-05	0.871452	0.110663
cg08857095	0.112855	4.02824	6.50181e-05	0.871452	0.141923
cg05548158	-0.168356	-4.0188	6.75175e-05	0.871452	0.435872
cg12977791	-0.247311	-4.01419	6.87686e-05	0.871452	0.116093
cg13255083	0.148048	4.01128	6.95753e-05	0.871452	0.25451
cg03061612	0.081483	4.00989	6.99938e-05	0.871452	0.197459
cg03388121	0.0879607	4.00695	7.08221e-05	0.871452	0.127543
cg04273871	0.0787312	4.00619	7.10445e-05	0.871452	0.104576
cg14567963	0.191055	3.99836	7.33612e-05	0.871452	0.160332
cg05746708	-0.164547	-3.99676	7.38403e-05	0.871452	0.232709
cg25373054	-0.255359	-3.97041	8.22229e-05	0.871452	0.101602
cg25491333	0.113958	3.9684	8.28982e-05	0.871452	0.218414
cg12186981	1.11781	3.96261	8.48729e-05	0.871452	0.906201
cg23987134	0.0934995	3.95317	8.8186e-05	0.871452	0.218278
cg23487517	-0.139619	-3.94925	8.9601e-05	0.871452	0.109539
cg08612384	0.081634	3.9438	9.15973e-05	0.871452	0.18528
cg03111560	0.508902	3.94148	9.24863e-05	0.871452	0.814653
cg06826552	-0.148838	-3.93661	9.43004e-05	0.871452	0.133505
cg05988342	-0.158633	-3.93538	9.47927e-05	0.871452	0.126376
cg15874302	0.121469	3.93309	9.57481e-05	0.871452	0.138159
cg08405558	0.07826	3.93196	9.60865e-05	0.871452	0.196564
cg06498964	-0.132819	-3.90465	0.00010725	0.871452	0.166421
cg14815675	0.0866628	3.89606	0.000111062	0.871452	0.260612
cg07566568	-0.0991188	-3.89345	0.000112173	0.871452	0.241073
cg27459803	0.0725731	3.86799	0.00012423	0.871452	0.322234
cg06023994	0.090744	3.8648	0.000125756	0.871452	0.204666
cg12949633	0.136391	3.85913	0.000128622	0.871452	0.202257
cg12491555	0.255254	3.84835	0.000134244	0.871452	0.106495
cg19758087	0.142479	3.84267	0.000137301	0.871452	0.125926
cg02489143	-0.362103	-3.83785	0.000139947	0.871452	0.34447
cg02736505	0.0897596	3.83012	0.000144317	0.871452	0.12347
cg08487618	0.121445	3.82969	0.000144563	0.871452	0.122358
cg15370163	0.145112	3.82515	0.000147142	0.871452	0.367017
cg03024251	-0.102197	-3.82062	0.000149827	0.871452	0.125316
cg06659926	-0.558826	-3.79835	0.000163532	0.871452	0.203378
cg22154859	-0.101936	-3.78611	0.000171517	0.871452	0.191802
cg12995384	0.209531	3.78524	0.000172103	0.871452	0.393817
cg18483526	0.0851282	3.7848	0.000172399	0.871452	0.157761
cg17212350	0.336003	3.78391	0.000173005	0.871452	0.470228
cg02890235	0.877047	3.78443	0.000173747	0.871452	0.958881
cg19999521	0.0982959	3.78265	0.000173853	0.871452	0.19866
cg19686983	-0.147672	-3.78203	0.000174276	0.871452	0.107398
cg01363734	0.162798	3.78146	0.000174667	0.871452	0.396677
cg11051095	-0.22026	-3.77698	0.000177744	0.871452	0.104623
cg06634441	-0.158614	-3.76979	0.0001828	0.871452	0.210556
cg07951674	0.106885	3.7673	0.000184578	0.871452	0.222594
cg17878139	-0.0917451	-3.7641	0.000186892	0.871452	0.156157
cg27648619	0.098032	3.76003	0.000189879	0.871452	0.192675
cg12600843	-0.11394	-3.75622	0.000192707	0.871452	0.234106
cg11339964	0.110093	3.75013	0.00019732	0.871452	0.174028
cg18735542	0.142064	3.7475	0.000199381	0.871452	0.206752
cg26878947	0.0663236	3.74602	0.000200484	0.871452	0.162639
cg16176766	-0.148176	-3.74528	0.000201368	0.871452	0.16211
cg20985852	0.110832	3.74466	0.000201587	0.871452	0.127638
cg04751358	-0.501313	-3.74271	0.000203704	0.871452	0.418559
cg04363755	0.0755006	3.74001	0.000205206	0.871452	0.147591
cg12017894	-0.0956833	-3.73822	0.00020699	0.871452	0.109309
cg26803955	-0.3324	-3.73813	0.000207064	0.871452	0.10864
cg23827421	0.920311	3.73229	0.000211474	0.871452	0.330247
cg22090055	0.251716	3.72803	0.000214929	0.871452	0.387473
cg11706129	-0.234575	-3.72472	0.000218403	0.871452	0.502929
cg06974143	0.25198	3.71881	0.000222709	0.871452	0.337805
cg06792417	0.0785334	3.71822	0.000223215	0.871452	0.109542
cg19049569	-0.273459	-3.71576	0.000225342	0.871452	0.183964
cg27184903	0.0638448	3.71409	0.000226789	0.871452	0.193091
cg14406501	-0.36892	-3.70915	0.000231145	0.871452	0.137522
cg25490693	0.0950534	3.70904	0.000231237	0.871452	0.244183
cg19961648	0.257442	3.70778	0.000232608	0.871452	0.101205
cg02449166	0.0930739	3.70619	0.000233785	0.871452	0.113688
cg04741920	-0.14244	-3.70584	0.000234152	0.871452	0.131778
cg19234014	0.124191	3.7029	0.00023686	0.871452	0.136988
cg04237246	-0.306732	-3.69979	0.000239648	0.871452	0.219135
cg20198923	0.121938	3.6967	0.000242454	0.871452	0.128601
cg00312944	0.149453	3.69558	0.000243546	0.871452	0.314045
cg26096190	0.116635	3.69518	0.000243872	0.871452	0.197611
cg19004019	0.635825	3.69108	0.000248137	0.871452	0.190993
cg15223080	0.771652	3.68615	0.00025245	0.871452	0.124216
cg21702625	-0.211992	-3.68142	0.00025796	0.871452	0.221539
cg05350220	0.10702	3.67771	0.000260722	0.871452	0.102187
cg02296932	-0.158651	-3.67769	0.000260738	0.871452	0.229021
cg19496823	0.171821	3.6763	0.00026212	0.871452	0.421683
cg02210151	0.333469	3.67404	0.000264393	0.871452	0.563112
cg13656878	0.0802582	3.67149	0.000266979	0.871452	0.174492
cg03658985	-0.121769	-3.67081	0.000267827	0.871452	0.329534
cg12578739	0.198565	3.66416	0.000274804	0.871452	0.271977
cg13351598	0.0891373	3.65951	0.000279483	0.871452	0.221412
cg06343669	-0.0914666	-3.65794	0.000281151	0.871452	0.210187
cg15619703	0.0691225	3.65509	0.000284153	0.871452	0.193372
cg07290257	0.0802826	3.65352	0.000285911	0.871452	0.110626
cg21701585	0.097338	3.65327	0.000286129	0.871452	0.244067
cg10390204	0.178767	3.64197	0.000298647	0.871452	0.23712
cg09293124	0.156949	3.6378	0.000303455	0.871452	0.138094
cg24389739	0.237323	3.63662	0.000304752	0.871452	0.167016
cg25396772	-0.120771	-3.63437	0.000307356	0.871452	0.104146
cg01152927	0.10524	3.63219	0.000309899	0.871452	0.178341
cg07164345	-0.348662	-3.63205	0.000310065	0.871452	0.306373
cg01759114	0.100608	3.62932	0.000313388	0.871452	0.223809
cg15843939	0.0878029	3.62896	0.000315011	0.871452	0.225836
cg01877639	0.0788888	3.62354	0.000320178	0.871452	0.139342
cg14189750	0.083515	3.6231	0.000320703	0.871452	0.100169
cg19436429	0.121311	3.62253	0.000321399	0.871452	0.266679
cg12391643	-0.2001	-3.61683	0.000328374	0.871452	0.209712
cg17204222	0.255708	3.61136	0.000335251	0.871452	0.281799
cg02746744	0.087547	3.60649	0.000341378	0.871452	0.113926
cg03708744	0.136746	3.60248	0.00034656	0.871452	0.296475
cg25461775	0.136254	3.60119	0.000348235	0.871452	0.109343
cg02227331	0.216604	3.6012	0.000348353	0.871452	0.266637
cg14545217	0.0995021	3.6	0.000349865	0.871452	0.129394
cg18818342	0.108382	3.59305	0.000359013	0.871452	0.273123
cg26467949	0.174633	3.59282	0.000359334	0.871452	0.114325
cg11663667	0.124932	3.59212	0.000360274	0.871452	0.140496
cg05014601	0.149982	3.58849	0.000365188	0.871452	0.287371
cg21167963	-0.181653	-3.58706	0.000367356	0.871452	0.121979
cg19719391	0.0714357	3.58681	0.000367569	0.871452	0.194814
cg05098152	0.140311	3.58322	0.000372454	0.871452	0.228922
cg04861640	-0.117066	-3.58125	0.000375416	0.871452	0.155311
cg26609236	0.20084	3.57886	0.00037857	0.871452	0.160233
cg24591575	-0.107378	-3.57571	0.000383037	0.871452	0.108152
cg03085088	0.169733	3.57508	0.000383943	0.871452	0.127218
cg08211606	-0.0746304	-3.57365	0.000385995	0.871452	0.105257
cg01674119	0.118181	3.57311	0.0003869	0.871452	0.290565
cg27590397	0.105758	3.57005	0.000391196	0.871452	0.110952
cg13258623	0.0997461	3.56852	0.000393428	0.871452	0.230574
cg27030234	-0.174178	-3.56839	0.000393618	0.871452	0.121872
cg20084692	0.102281	3.5678	0.000394493	0.871452	0.136009
cg13765544	0.287536	3.56635	0.000396697	0.871452	0.55814
cg09882672	0.055976	3.56535	0.00039817	0.871452	0.195878
cg23807718	0.194259	3.56493	0.000398931	0.871452	0.124846
cg03520802	0.0636232	3.55997	0.000406285	0.871452	0.217017
cg08641302	0.0734816	3.55843	0.000408474	0.871452	0.179063
cg19619258	0.261272	3.55632	0.000412201	0.871452	0.341046
cg14574237	0.071777	3.55566	0.000412976	0.871452	0.156615
cg19502709	0.174761	3.55309	0.00041664	0.871452	0.184893
cg07609623	-0.266239	-3.54849	0.000423875	0.871452	0.224966
cg23913254	0.542054	3.54682	0.00042674	0.871452	0.102419
cg09741958	-0.404467	-3.54438	0.000430298	0.871452	0.254721
cg24472574	0.263208	3.54388	0.0004311	0.871452	0.131906
cg25097497	0.0957357	3.54012	0.00043713	0.871452	0.112505
cg02794519	0.128995	3.53734	0.000441644	0.871452	0.334445
cg13768249	-0.268328	-3.53733	0.000441664	0.871452	0.159163
cg27005715	0.0806132	3.53608	0.0004437	0.871452	0.19906
cg20453176	0.0558245	3.53419	0.000446809	0.871452	0.105909
cg06074896	0.12748	3.53291	0.000449078	0.871452	0.161878
cg00155879	0.0842809	3.53229	0.000449961	0.871452	0.205847
cg20199709	0.255561	3.53078	0.000452556	0.871452	0.501633
cg01021719	-0.115071	-3.53036	0.000453168	0.871452	0.155517
cg14683065	0.227804	3.52822	0.000456768	0.871452	0.303732
cg16437000	-0.421246	-3.52791	0.000457285	0.871452	0.249092
cg09234983	0.0911358	3.52784	0.000457401	0.871452	0.102408
cg04026000	0.0520691	3.52764	0.000457743	0.871452	0.135026
cg12129789	0.0794276	3.52675	0.000459251	0.871452	0.19027
cg19002027	0.102367	3.52624	0.000460104	0.871452	0.231217
cg15889797	-0.0532479	-3.52559	0.000461211	0.871452	0.101469
cg18386117	0.157231	3.52481	0.000462529	0.871452	0.117523
cg13870866	0.0618616	3.52411	0.000463724	0.871452	0.133525
cg27306191	-0.169153	-3.52331	0.000465105	0.871452	0.178865
cg14301562	0.0918378	3.52263	0.000466262	0.871452	0.163327
cg04017326	-0.0913119	-3.52241	0.000466636	0.871452	0.147888
cg01976138	-0.195824	-3.52139	0.00046839	0.871452	0.150289
cg17264240	0.169492	3.52056	0.000469836	0.871452	0.215471
cg07588355	0.123501	3.52037	0.000470153	0.871452	0.201792
cg16601569	0.131631	3.52023	0.000470482	0.871452	0.259272
cg16771950	0.0521367	3.5194	0.000471836	0.871452	0.105833
cg02506226	0.0774197	3.51885	0.000472871	0.871452	0.177351
cg22082549	0.109076	3.51338	0.000482561	0.871452	0.176908
cg10361589	0.100996	3.51239	0.000484153	0.871452	0.223039
cg01658421	0.0917028	3.51202	0.000484806	0.871452	0.130961
cg06690906	0.0895925	3.51193	0.000484964	0.871452	0.26907
cg12746557	-0.262625	-3.50953	0.00048927	0.871452	0.520289
cg27213210	-0.708933	-3.50652	0.000494701	0.871452	0.171989
cg14710552	-0.302491	-3.5069	0.000495032	0.871452	0.130725
cg17121205	0.159943	3.50596	0.000495709	0.871452	0.402049
cg26412808	0.14732	3.50584	0.0004961	0.871452	0.129425
cg08320524	-0.231538	-3.50493	0.000497581	0.871452	0.35108
cg11936825	0.108837	3.50454	0.000498378	0.871452	0.140629
cg18274619	-0.0490658	-3.50351	0.000500184	0.871452	0.128357
cg23836365	0.0623184	3.5026	0.000501846	0.871452	0.154411
cg03657038	-0.323589	-3.50234	0.00050293	0.871452	0.163992
cg02681695	0.140353	3.50157	0.000503833	0.871452	0.109559
cg18964529	-0.387939	-3.49883	0.000508821	0.871452	0.11117
cg24811929	0.599277	3.4985	0.00050962	0.871452	0.153446
cg23811153	0.487455	3.49801	0.000510539	0.871452	0.181749
cg07673740	0.0682671	3.49431	0.000517391	0.871452	0.150034
cg22261853	0.102407	3.49193	0.000521915	0.871452	0.13909
cg20606093	0.154665	3.49158	0.00052277	0.871452	0.13766
cg24082681	-0.127959	-3.48979	0.000525927	0.871452	0.146734
cg25787654	0.52083	3.48758	0.000530185	0.871452	0.103302
cg07044115	0.453751	3.48615	0.000532965	0.871452	0.709466
cg13159413	-0.672298	-3.48625	0.00053303	0.871452	0.279698
cg08561253	-0.425477	-3.48575	0.000533737	0.871452	0.287285
cg09937812	0.0899741	3.48463	0.000535939	0.871452	0.217924
cg15664905	0.0661413	3.48267	0.000539766	0.871452	0.196106
cg07927257	0.1468	3.4827	0.000540074	0.871452	0.106962
cg00409684	0.0725691	3.48123	0.000542615	0.871452	0.128581
cg01629740	0.13307	3.48022	0.000544879	0.871452	0.317227
cg06791446	0.435314	3.48002	0.000545004	0.871452	0.693782
cg25430941	0.12722	3.48034	0.000545101	0.871452	0.247708
cg23336241	-0.0984019	-3.47862	0.000547883	0.871452	0.219494
cg26637872	0.182136	3.47827	0.000548595	0.871452	0.205668
cg02424637	-0.175317	-3.47803	0.000549254	0.871452	0.162112
cg08319412	0.121894	3.47763	0.000549781	0.871452	0.240991
cg11182328	0.114736	3.47704	0.000551138	0.871452	0.300052
cg09166450	-0.144598	-3.47676	0.000551614	0.871452	0.222006
cg05923736	-0.254256	-3.47527	0.000554708	0.871452	0.11702
cg26547424	0.0936866	3.47503	0.000555107	0.871452	0.112341
cg24315885	-0.599448	-3.47195	0.000561915	0.871452	0.909567
cg05736011	0.207332	3.47125	0.000562881	0.871452	0.435295
cg13437682	0.247813	3.46989	0.000565486	0.871452	0.518699
cg03408433	0.122788	3.46961	0.000566245	0.871452	0.122969
cg00074174	0.0790301	3.46947	0.000566623	0.871452	0.197143
cg22347967	-0.125343	-3.46951	0.000567973	0.871452	0.297943
cg05767421	0.0917937	3.46792	0.000569644	0.871452	0.179482
cg04420889	0.18293	3.46714	0.000571169	0.871452	0.474205
cg25440497	0.072588	3.4662	0.000573124	0.871452	0.183416
cg18674312	0.127345	3.46373	0.000578457	0.871452	0.298612
cg22447106	0.169756	3.462	0.000581919	0.871452	0.408236
cg04740405	0.0931743	3.46166	0.000582738	0.871452	0.234648
cg13800477	-0.175881	-3.46061	0.000584868	0.871452	0.281525
cg04742029	0.147189	3.45695	0.000592671	0.871452	0.25013
cg23945633	0.061195	3.45307	0.000601054	0.871452	0.154994
cg25451120	0.0576517	3.44777	0.000612703	0.871452	0.200772
cg05311383	-0.13379	-3.44639	0.000615765	0.871452	0.123854
cg10289460	-0.429996	-3.44643	0.000616157	0.871452	0.756293
cg14116153	0.169854	3.44336	0.000622646	0.871452	0.252961
cg17692251	-0.206072	-3.44289	0.000623693	0.871452	0.139671
cg19985870	0.0572766	3.44083	0.000628248	0.871452	0.162199
cg12445970	0.113991	3.44058	0.000628817	0.871452	0.295661
cg07951209	0.0769554	3.43953	0.000631219	0.871452	0.137161
cg19693760	0.135102	3.43835	0.000633893	0.871452	0.102923
cg26477576	0.0859342	3.43721	0.000636613	0.871452	0.215372
cg10379346	0.408297	3.43662	0.000637881	0.871452	0.712511
cg05151360	0.0825153	3.43431	0.000643311	0.871452	0.120399
cg10326379	0.0655986	3.43397	0.000643985	0.871452	0.247495
cg16320413	-0.245488	-3.43355	0.000647294	0.871452	0.115458
cg10224640	0.10042	3.43137	0.000650051	0.871452	0.137393
cg02561226	0.147472	3.43108	0.000650736	0.871452	0.194851
cg20002901	-0.214007	-3.43063	0.000652099	0.871452	0.397542
cg25725843	0.0881128	3.42945	0.000654558	0.871452	0.205256
cg04115766	-0.279139	-3.42847	0.00065688	0.871452	0.10781
cg08021508	-0.159214	-3.4283	0.000657274	0.871452	0.167456
cg13224161	-0.163278	-3.42828	0.000657338	0.871452	0.343931
cg21630608	0.0809948	3.42825	0.000657394	0.871452	0.154943
cg05373457	0.0872475	3.4279	0.000658221	0.871452	0.192244
cg24878631	-0.113977	-3.42369	0.000668782	0.871452	0.190625
cg26557936	0.181507	3.4232	0.000669442	0.871452	0.266661
cg12712409	-0.0981966	-3.42321	0.000671016	0.871452	0.14521
cg00378211	0.232414	3.42096	0.000674863	0.871452	0.490043
cg10242763	0.0834393	3.41893	0.000679908	0.871452	0.123371
cg20567537	0.105078	3.41736	0.000683741	0.871452	0.136615
cg25636957	0.0994077	3.41731	0.000683981	0.871452	0.284021
cg19259335	-0.204097	-3.41624	0.000686391	0.871452	0.10293
cg19767339	0.0877086	3.41483	0.000689869	0.871452	0.261359
cg11919810	-0.606957	-3.41423	0.000691362	0.871452	0.192404
cg05384123	0.119386	3.41354	0.000693066	0.871452	0.258232
cg16961769	0.367416	3.41332	0.000693611	0.871452	0.267897
cg14627862	-0.107691	-3.41186	0.00069726	0.871452	0.144854
cg26276690	-0.163331	-3.41158	0.000697962	0.871452	0.210992
cg11617013	-0.145212	-3.41063	0.000700341	0.871452	0.127498
cg03251967	0.109596	3.40925	0.000703801	0.871452	0.170293
cg11755635	0.423985	3.4084	0.000705969	0.871452	0.653603
cg13351406	-0.0755993	-3.40749	0.000708268	0.871452	0.225791
cg23094614	0.930471	3.4068	0.000710559	0.871452	0.101581
cg24794052	0.386162	3.4057	0.00071281	0.871452	0.294695
cg25026125	-0.109426	-3.40469	0.000715387	0.871452	0.108247
cg04591230	0.0865697	3.40414	0.000716798	0.871452	0.247717
cg18959081	0.167109	3.40384	0.000717695	0.871452	0.166925
cg06005876	0.0715037	3.40352	0.0007184	0.871452	0.229815
cg06653507	0.505258	3.4024	0.000721288	0.871452	0.610781
cg04107759	0.207409	3.40155	0.000723481	0.871452	0.387158
cg07607369	0.137367	3.40145	0.00072373	0.871452	0.120099
cg21035990	0.138805	3.401	0.00072502	0.871452	0.266729
cg12974796	-0.329168	-3.40071	0.000725662	0.871452	0.117179
cg00905858	0.0966019	3.39921	0.000729547	0.871452	0.118127
cg06265338	-0.108326	-3.397	0.000735346	0.871452	0.35418
cg23517300	0.196318	3.39639	0.000736931	0.871452	0.124396
cg23520260	0.13359	3.39527	0.000739904	0.871452	0.146453
cg04574732	0.225018	3.39469	0.000741975	0.871452	0.129737
cg18007641	0.153181	3.39386	0.000743625	0.871452	0.204262
cg05918327	0.0847636	3.39378	0.000743843	0.871452	0.137188
cg13399478	-0.106464	-3.39358	0.000744937	0.871452	0.203472
cg21685427	0.13646	3.39323	0.000745311	0.871452	0.373749
cg27496117	0.0599275	3.39318	0.000745533	0.871452	0.178869
cg18772205	0.117838	3.39153	0.000749943	0.871452	0.195628
cg01244775	0.145668	3.38943	0.000755581	0.871452	0.224835
cg12936674	0.0707807	3.38914	0.000756249	0.871452	0.201411
cg13191695	0.084538	3.38846	0.00075819	0.871452	0.218016
cg09350013	0.103872	3.38635	0.000763801	0.871452	0.211308
cg05252093	-0.0929081	-3.38603	0.000765027	0.871452	0.2026
cg19203401	-0.313635	-3.38575	0.000765548	0.871452	0.419495
cg19581426	0.117357	3.38396	0.000770553	0.871452	0.295864
cg19787976	0.698692	3.3831	0.000774106	0.871452	0.109064
cg02002551	0.112456	3.38074	0.000779333	0.871452	0.171317
cg17907911	0.109803	3.38066	0.000779435	0.871452	0.157454
cg08148252	0.351317	3.38056	0.00077971	0.871452	0.173113
cg19785559	0.112381	3.38012	0.000781171	0.871452	0.189983
cg22525069	0.0760417	3.37949	0.000782696	0.871452	0.120822
cg12728129	0.102987	3.37883	0.000784526	0.871452	0.237177
cg16226669	0.0787337	3.37879	0.000784628	0.871452	0.118187
cg13570864	0.742858	3.37744	0.000788982	0.871452	0.211109
cg07317326	0.112314	3.37686	0.000790148	0.871452	0.190486
cg16462073	0.0549917	3.37617	0.000791971	0.871452	0.162
cg07124229	0.0865166	3.37601	0.000792435	0.871452	0.25019
cg24085885	-0.0573794	-3.3756	0.000793597	0.871452	0.109283
cg20246743	0.418947	3.37566	0.000793642	0.871452	0.723009
cg14074970	-0.111349	-3.37272	0.000801964	0.871452	0.189794
cg14968358	0.327882	3.37184	0.000804246	0.871452	0.381139
cg07188513	0.0958172	3.37187	0.000804297	0.871452	0.106136
cg25939151	-0.172245	-3.37174	0.000804536	0.871452	0.164078
cg25654695	-0.0933409	-3.37182	0.000804556	0.871452	0.252314
cg00690049	0.166947	3.37166	0.000805	0.871452	0.450826
cg12175883	0.123057	3.37106	0.000806495	0.871452	0.237076
cg13997504	0.102236	3.37089	0.000806979	0.871452	0.114889
cg14044695	-0.103566	-3.37077	0.000807299	0.871452	0.242925
cg11904871	-0.0861956	-3.37074	0.000807409	0.871452	0.130175
cg14008146	0.109718	3.36937	0.00081133	0.871452	0.332121
cg11718675	0.870977	3.36896	0.000812859	0.871452	0.728008
cg07165619	0.0711226	3.36852	0.000813891	0.871452	0.206785
cg11353706	0.0800745	3.36842	0.00081408	0.871452	0.193615
cg13009484	0.179374	3.36834	0.000814311	0.871452	0.136299
cg21534951	0.0521312	3.36796	0.000815515	0.871452	0.126117
cg25291867	0.103528	3.36655	0.000819479	0.871452	0.203226
cg07629517	-0.238192	-3.36577	0.000821889	0.871452	0.198506
cg17716220	0.111018	3.3638	0.000828485	0.871452	0.316111
cg10191799	0.136493	3.36326	0.000829104	0.871452	0.235698
cg14016620	0.446653	3.36323	0.000829194	0.871452	0.172927
cg04232095	0.0839364	3.36312	0.000829619	0.871452	0.205399
cg23920293	-0.960909	-3.3628	0.000830701	0.871452	0.233396
cg24752427	-0.49954	-3.36242	0.000831567	0.871452	0.206309
cg10353683	0.0625676	3.36177	0.000833482	0.871452	0.202384
cg03459809	-0.0918332	-3.36093	0.000836584	0.871452	0.217432
cg00547215	0.0744924	3.36042	0.000837466	0.871452	0.225225
cg19416156	-1.0562	-3.3588	0.000842303	0.871452	0.986697
cg13621612	-0.0979573	-3.35858	0.000842935	0.871452	0.100442
cg04846191	-0.0869503	-3.35761	0.000845845	0.871452	0.124677
cg06697814	-0.102826	-3.35687	0.000848068	0.871452	0.133769
cg16653991	-0.3989	-3.35605	0.000850515	0.871452	0.717604
cg22288315	0.514275	3.35465	0.000854867	0.871452	0.384027
cg02986404	0.116396	3.3521	0.000862465	0.871452	0.353065
cg09735228	-0.20267	-3.35159	0.000864043	0.871452	0.221968
cg11769911	0.0805568	3.35082	0.000866621	0.871452	0.259082
cg10143783	0.0775613	3.35081	0.000866668	0.871452	0.200704
cg07273376	0.0959422	3.35044	0.000867558	0.871452	0.182242
cg04009062	0.0765552	3.35041	0.000867643	0.871452	0.108868
cg03469221	0.0659863	3.35003	0.000868946	0.871452	0.239931
cg24539848	0.238203	3.34895	0.000872239	0.871452	0.21966
cg21216471	-0.0567135	-3.34836	0.000873949	0.871452	0.135167
cg25114630	-0.399558	-3.34942	0.000874068	0.871452	0.136381
cg09608008	0.0951298	3.34794	0.000875226	0.871452	0.141021
cg14820579	-0.114697	-3.34679	0.00087893	0.871452	0.165175
cg16554331	0.0670495	3.34637	0.000880113	0.871452	0.226486
cg22102391	-0.105116	-3.34493	0.000884596	0.871452	0.11037
cg08576768	-0.107077	-3.34468	0.000885369	0.871452	0.2206
cg00909993	0.505242	3.34351	0.000889024	0.871452	0.189757
cg15119070	0.0596976	3.34177	0.000894484	0.871452	0.201898
cg03062865	0.0603168	3.34112	0.000896557	0.871452	0.107185
cg09283484	0.053727	3.34089	0.000897537	0.871452	0.152645
cg14212748	0.0679763	3.338	0.000906439	0.871452	0.212534
cg04362886	0.0913935	3.33622	0.000912142	0.871452	0.26326
cg27421195	0.626597	3.3361	0.000912525	0.871452	0.234672
cg16039142	0.0630246	3.33496	0.0009162	0.871452	0.146536
cg25010880	0.395068	3.33504	0.000916319	0.871452	0.157454
cg03300537	0.143243	3.33491	0.000916362	0.871452	0.163407
cg01936481	-0.10429	-3.33486	0.00091666	0.871452	0.172977
cg23258840	0.0648752	3.33463	0.000917254	0.871452	0.148956
cg07250315	0.0648752	3.33455	0.000917525	0.871452	0.19415
cg25824218	0.373487	3.33375	0.000920091	0.871452	0.582374
cg17815695	0.156693	3.33373	0.000920162	0.871452	0.234788
cg06832364	0.173685	3.33337	0.000921347	0.871452	0.107754
cg03675845	0.195824	3.33265	0.00092367	0.871452	0.380668
cg13862927	-0.117149	-3.33139	0.000928036	0.871452	0.247569
cg00700324	0.146934	3.33121	0.000928353	0.871452	0.107571
cg20954737	0.0629824	3.32878	0.000936588	0.871452	0.101489
cg26287609	-0.0683331	-3.32859	0.000936928	0.871452	0.112603
cg18482112	-0.328462	-3.32797	0.0009391	0.871452	0.235808
cg17510003	0.088039	3.32744	0.000941003	0.871452	0.139001
cg13263114	0.114121	3.32709	0.000941884	0.871452	0.100629
cg01582937	0.109547	3.32681	0.000942949	0.871452	0.167046
cg17664233	-0.22553	-3.32665	0.000943334	0.871452	0.102676
cg26359958	-0.251701	-3.32579	0.000946581	0.871452	0.368981
cg01876812	0.0929136	3.32499	0.000948986	0.871452	0.263854
cg08086949	-0.20062	-3.32348	0.000954144	0.871452	0.107968
cg20279283	0.066793	3.32315	0.000954985	0.871452	0.105324
cg09100286	-0.108789	-3.32269	0.000956677	0.871452	0.150486
cg02409364	0.0620344	3.32248	0.000957365	0.871452	0.159472
cg21478833	0.0901786	3.32166	0.00096	0.871452	0.17095
cg20950573	-0.298943	-3.32124	0.000961694	0.871452	0.159376
cg19284211	0.0808784	3.32057	0.000963927	0.871452	0.134932
cg27342759	0.0715389	3.32029	0.000964635	0.871452	0.164911
cg06414921	-0.268891	-3.32016	0.000965748	0.871452	0.176505
cg14098613	-0.134702	-3.31965	0.000966925	0.871452	0.125905
cg21459756	-0.174345	-3.31956	0.000967635	0.871452	0.17129
cg25052156	0.487315	3.31907	0.000968745	0.871452	0.572801
cg22840887	-0.29942	-3.31886	0.000969461	0.871452	0.763026
cg13166854	0.120523	3.31869	0.000970447	0.871452	0.100707
cg10503236	0.34486	3.31814	0.00097192	0.871452	0.126791
cg06287704	0.106206	3.31758	0.000974223	0.871452	0.151821
cg02561009	-0.166948	-3.31601	0.000979476	0.871452	0.129545
cg16534501	-0.134852	-3.31549	0.000980985	0.871452	0.113641
cg11977488	0.0993954	3.31342	0.000988092	0.871452	0.134186
cg06288131	0.107262	3.31341	0.000988146	0.871452	0.292818
cg08899523	-0.343417	-3.31336	0.000988326	0.871452	0.675102
cg00666772	0.0660385	3.31241	0.000991863	0.871452	0.107969
cg00521428	0.113916	3.31155	0.000994579	0.871452	0.104413
cg02905163	0.494419	3.31121	0.000995769	0.871452	0.269849
cg13832735	-0.148175	-3.31118	0.000995874	0.871452	0.157041
cg06013841	0.0881915	3.31113	0.00099604	0.871452	0.222567
cg09185147	0.0994515	3.3111	0.000996164	0.871452	0.25476
cg27130359	0.0826203	3.31081	0.000997184	0.871452	0.23463
cg24019471	0.13356	3.3101	0.000999799	0.871452	0.25138
cg18685455	0.134265	3.30985	0.00100094	0.871452	0.348208
cg07408673	-0.153794	-3.30949	0.00100193	0.871452	0.135029
cg04539240	-0.0627638	-3.30904	0.00100336	0.871452	0.184174
cg03745207	0.0569944	3.30731	0.00100944	0.871452	0.183234
cg23048115	0.0752394	3.30664	0.00101181	0.871452	0.169543
cg18696900	0.0892374	3.30456	0.00101917	0.871452	0.195956
cg14683248	-0.108397	-3.30292	0.00102502	0.871452	0.118473
cg18521925	0.115865	3.30265	0.00102599	0.871452	0.115597
cg26935338	0.089646	3.30181	0.001029	0.871452	0.273807
cg08629869	-0.15521	-3.30189	0.00102915	0.871452	0.122379
cg01682287	0.109241	3.29992	0.00103597	0.871452	0.258023
cg09561072	0.075333	3.29982	0.00103659	0.871452	0.30094
cg25514427	0.317862	3.29946	0.00103747	0.871452	0.548496
cg15616193	0.175322	3.29926	0.00103819	0.871452	0.180376
cg08630923	0.0708086	3.29877	0.00103996	0.871452	0.207449
cg08206898	-0.486181	-3.29849	0.00104098	0.871452	0.182773
cg10162698	-0.349574	-3.29837	0.00104157	0.871452	0.11769
cg25859972	0.0977017	3.29797	0.00104287	0.871452	0.228626
cg08534628	0.0546501	3.29683	0.00104701	0.871452	0.162133
cg03502211	-0.179882	-3.29662	0.00104781	0.871452	0.163483
cg20854480	0.0910002	3.29636	0.00104875	0.871452	0.159931
cg17885959	0.0952866	3.29612	0.00104976	0.871452	0.106118
cg00786761	-0.210523	-3.29578	0.00105087	0.871452	0.15258
cg21198036	0.083229	3.29568	0.00105123	0.871452	0.203314
cg26052456	0.102528	3.29514	0.0010532	0.871452	0.253408
cg18854474	0.102845	3.29427	0.00105654	0.871452	0.108739
cg01900759	-0.0995008	-3.29415	0.001057	0.871452	0.268094
cg02148001	0.101284	3.29376	0.00105843	0.871452	0.159452
cg18022005	0.0976148	3.2933	0.00105997	0.871452	0.304005
cg01517728	0.0697558	3.29304	0.00106096	0.871452	0.136711
cg16033846	-0.248938	-3.29297	0.00106121	0.871452	0.128507
cg25036441	0.124734	3.29283	0.00106173	0.871452	0.354103
cg13686456	0.0682125	3.29272	0.00106213	0.871452	0.171917
cg00851830	-0.113946	-3.29253	0.00106298	0.871452	0.108108
cg24716167	0.0644123	3.29143	0.00106691	0.871452	0.159867
cg09228140	0.577422	3.29112	0.00106805	0.871452	0.189873
cg27418891	-0.12288	-3.29032	0.00107118	0.871452	0.112207
cg09062218	0.115421	3.29024	0.00107132	0.871452	0.152366
cg14301425	0.104706	3.28923	0.00107508	0.871452	0.106111
cg09365240	0.072877	3.28922	0.00107543	0.871452	0.240894
cg22489311	0.0593653	3.28894	0.00107619	0.871452	0.210725
cg17566325	0.293454	3.28847	0.00107795	0.871452	0.631096
cg14119558	0.0692606	3.28814	0.00107919	0.871452	0.164395
cg09175221	0.12245	3.28744	0.00108181	0.871452	0.237332
cg19981005	0.18669	3.28711	0.00108305	0.871452	0.187341
cg03233885	0.0808525	3.28689	0.00108389	0.871452	0.135724
cg10810999	0.0775208	3.28676	0.00108437	0.871452	0.14568
cg18203974	0.0685776	3.28667	0.00108471	0.871452	0.189806
cg01974091	-0.118192	-3.2857	0.00108867	0.871452	0.226217
cg01882862	0.0594744	3.28467	0.00109243	0.871452	0.165285
cg08076912	0.485541	3.28371	0.00109591	0.871452	0.161955
cg27213549	-0.0918354	-3.28221	0.00110163	0.871452	0.24908
cg03430961	0.0652177	3.28193	0.00110271	0.871452	0.218198
cg21187312	0.135713	3.28153	0.00110425	0.871452	0.276538
cg08087969	0.146564	3.28056	0.00110798	0.871452	0.382773
cg01095506	0.614106	3.27946	0.00111234	0.871452	0.186221
cg20594135	0.0401886	3.27891	0.00111433	0.871452	0.103847
cg19165390	0.0560102	3.2788	0.00111476	0.871452	0.139652
cg08225009	0.0775556	3.27776	0.00111878	0.871452	0.145705
cg24216777	-0.0814851	-3.27652	0.00112362	0.871452	0.13339
cg11385411	-0.0754878	-3.27608	0.00112533	0.871452	0.164464
cg18096372	0.0702532	3.27584	0.00112626	0.871452	0.142474
cg23966795	0.11051	3.2756	0.00112748	0.871452	0.126951
cg13667199	-0.0924667	-3.27442	0.00113195	0.871452	0.150502
cg09039893	-0.119355	-3.27282	0.00113809	0.871452	0.12149
cg26349536	-0.110364	-3.27249	0.00113942	0.871452	0.211753
cg09219776	0.0792003	3.27168	0.0011426	0.871452	0.250027
cg00927494	0.293079	3.27103	0.00114548	0.871452	0.148747
cg00649833	0.133725	3.27053	0.00114899	0.871452	0.132023
cg18382401	0.571937	3.26959	0.00115122	0.871452	0.297627
cg22874789	0.199227	3.26949	0.0011513	0.871452	0.202567
cg22580846	0.0675744	3.26925	0.00115225	0.871452	0.160492
cg22402154	0.191143	3.26814	0.00115668	0.871452	0.200852
cg10281977	0.0872553	3.26748	0.00115947	0.871452	0.127614
cg00251405	0.0986929	3.2668	0.00116207	0.871452	0.178883
cg13627062	0.228111	3.26539	0.00116789	0.871452	0.167859
cg04340234	-0.121425	-3.26514	0.00116874	0.871452	0.112776
cg19055270	-0.179907	-3.26465	0.00117074	0.871452	0.171988
cg13286786	0.0651044	3.26386	0.00117392	0.871452	0.224011
cg22970357	0.0703548	3.26387	0.00117405	0.871452	0.110961
cg22945467	0.0794081	3.2632	0.00117661	0.871452	0.19328
cg16368936	0.0737524	3.26299	0.00117746	0.871452	0.133334
cg23646109	-0.421287	-3.26246	0.00117962	0.871452	0.562793
cg06010032	0.0802487	3.26096	0.00118574	0.871452	0.112853
cg19517940	0.076106	3.26051	0.0011876	0.871452	0.212587
cg22133704	0.493294	3.25922	0.00119288	0.871452	0.584728
cg21668244	-0.16807	-3.25904	0.00119377	0.871452	0.198116
cg06866395	0.0665851	3.25793	0.00119837	0.871452	0.111991
cg06771637	0.168383	3.25708	0.00120175	0.871452	0.131426
cg08696107	0.140631	3.25598	0.00120629	0.871452	0.315115
cg05020409	-0.190014	-3.25605	0.00120646	0.871452	0.29463
cg20006294	0.0710278	3.25307	0.00121844	0.871452	0.278762
cg00679769	-0.605934	-3.25331	0.00122119	0.871452	0.269028
cg02848074	0.0814612	3.25235	0.0012215	0.871452	0.102632
cg17715990	0.0819277	3.25226	0.00122186	0.871452	0.233349
cg01273393	0.129962	3.25204	0.00122278	0.871452	0.139483
cg14389608	0.183068	3.25071	0.0012284	0.871452	0.118972
cg14240353	0.0855031	3.24887	0.0012362	0.871452	0.222816
cg03107888	0.0790239	3.24882	0.00123644	0.871452	0.101771
cg17804750	-0.404394	-3.24848	0.00123802	0.871452	0.10568
cg13872789	0.0881746	3.24772	0.00124111	0.871452	0.283584
cg25425537	0.083461	3.24712	0.00124385	0.871452	0.245683
cg03670908	0.087705	3.24713	0.00124394	0.871452	0.204678
cg17090589	0.144626	3.24701	0.00124431	0.871452	0.146095
cg10618553	-0.0815577	-3.24591	0.00124901	0.871452	0.167459
cg10881311	-0.403521	-3.24575	0.00124987	0.871452	0.388598
cg16658579	0.118613	3.24477	0.00125378	0.871452	0.118239
cg10724965	0.120353	3.24463	0.00125453	0.871452	0.202303
cg08110272	0.149573	3.24462	0.00125538	0.871452	0.157575
cg15033228	0.0645176	3.24418	0.00125679	0.871452	0.129446
cg01581507	0.131032	3.24342	0.00125959	0.871452	0.358123
cg13818504	0.360571	3.24296	0.00126223	0.871452	0.449748
cg20499101	0.587583	3.2424	0.00126468	0.871452	0.488994
cg16584406	0.0565976	3.24219	0.0012651	0.871452	0.17078
cg23769521	0.157051	3.24204	0.0012656	0.871452	0.135356
cg00332776	0.0603349	3.2414	0.0012684	0.871452	0.155101
cg18449120	0.0557498	3.24135	0.00126858	0.871452	0.155355
cg17378969	0.0947103	3.24122	0.00126918	0.871452	0.318293
cg00589502	0.0766215	3.24068	0.00127154	0.871452	0.181944
cg19725484	0.147202	3.24058	0.00127197	0.871452	0.249913
cg04858617	-0.433417	-3.24024	0.00127345	0.871452	0.213617
cg19589060	0.114185	3.23935	0.00127734	0.871452	0.116223
cg10989806	-0.184322	-3.23826	0.00128214	0.871452	0.103044
cg26801137	-0.168904	-3.23828	0.00128236	0.871452	0.133501
cg00398268	-0.12053	-3.23796	0.00128344	0.871452	0.141222
cg19797280	-0.220007	-3.23761	0.00128549	0.871452	0.212386
cg00151073	0.0881777	3.23682	0.00128863	0.871452	0.264534
cg23466013	-0.157389	-3.23582	0.0012929	0.871452	0.123578
cg05703053	0.183049	3.23575	0.00129322	0.871452	0.344421
cg03505501	0.113851	3.23581	0.00129343	0.871452	0.138045
cg00991467	0.104841	3.23548	0.00129444	0.871452	0.153151
cg22993934	0.0525965	3.23464	0.00129815	0.871452	0.20768
cg22809176	0.154046	3.2342	0.00130043	0.871452	0.15424
cg01130991	0.0919274	3.23346	0.00130344	0.871452	0.237474
cg23857896	0.0473486	3.23347	0.00130355	0.871452	0.143159
cg25800753	0.0490146	3.23294	0.00130574	0.871452	0.162872
cg26249524	-0.0798954	-3.23277	0.00130653	0.871452	0.152579
cg01102696	0.108967	3.23263	0.00130715	0.871452	0.240849
cg25171858	0.0934498	3.23219	0.00130926	0.871452	0.180238
cg14260265	-0.109486	-3.23154	0.00131202	0.871452	0.132425
cg04798273	0.0643913	3.23139	0.00131289	0.871452	0.112914
cg15027303	0.112549	3.23078	0.00131546	0.871452	0.12353
cg17385448	0.0790751	3.23036	0.00131751	0.871452	0.205298
cg14543152	-0.0698406	-3.22968	0.00132042	0.871452	0.137918
cg08481674	0.137443	3.22927	0.00132229	0.871452	0.383161
cg04472227	0.0782095	3.22884	0.00132423	0.871452	0.1919
cg23586821	-0.214642	-3.22834	0.00132684	0.871452	0.460201
cg18336236	-0.225829	-3.22822	0.00132739	0.871452	0.12175
cg07075268	0.0859802	3.22794	0.00132849	0.871452	0.237023
cg02907638	-0.111192	-3.22756	0.00133003	0.871452	0.197783
cg20370771	0.422878	3.22716	0.00133221	0.871452	0.130103
cg25065815	-0.144798	-3.22676	0.00133403	0.871452	0.190125
cg08727879	-0.0789832	-3.226	0.00133732	0.871452	0.213999
cg12656740	0.0611967	3.22496	0.00134193	0.871452	0.141364
cg04467618	0.0780217	3.22496	0.00134193	0.871452	0.123531
cg04020328	-0.1291	-3.22419	0.00134547	0.871452	0.100099
cg26246584	-0.133851	-3.22375	0.00134768	0.871452	0.115066
cg08120141	0.294544	3.2236	0.0013482	0.871452	0.217553
cg09024023	-0.90491	-3.22373	0.00134827	0.871452	0.369189
cg26166618	0.0773442	3.22353	0.00134868	0.871452	0.230522
cg09267763	-0.196587	-3.2232	0.00135071	0.871452	0.342492
cg26452989	-0.115511	-3.22241	0.00135369	0.871452	0.101743
cg16879608	-0.059723	-3.2223	0.00135417	0.871452	0.131233
cg16361543	0.0705354	3.22234	0.00135418	0.871452	0.120955
cg10493855	-0.131904	-3.2211	0.00135978	0.871452	0.163598
cg12637397	0.139877	3.22026	0.00136366	0.871452	0.2268
cg05595936	-0.139357	-3.21869	0.00137101	0.871452	0.121803
cg17498845	0.174931	3.21858	0.0013715	0.871452	0.199267
cg15064599	0.0658069	3.21844	0.00137233	0.871452	0.10938
cg05678654	0.0595179	3.21814	0.00137358	0.871452	0.187515
cg13523718	0.803971	3.21804	0.00137438	0.871452	0.794237
cg14176755	-0.892147	-3.21779	0.00137574	0.871452	0.122821
cg25819441	0.068475	3.21755	0.00137633	0.871452	0.138811
cg18191092	0.155602	3.21734	0.00137751	0.871452	0.172183
cg27161088	-0.110385	-3.217	0.00137892	0.871452	0.102905
cg00593213	0.365809	3.21668	0.0013808	0.871452	0.112845
cg23349354	-0.796035	-3.21632	0.00138233	0.871452	0.143252
cg04185057	0.192272	3.21604	0.00138362	0.871452	0.318308
cg19685627	0.0989123	3.21585	0.00138453	0.871452	0.192816
cg08789695	0.065587	3.21582	0.00138466	0.871452	0.142574
cg09888012	0.083904	3.21512	0.00138779	0.871452	0.167591
cg13848598	0.0558907	3.21486	0.00138905	0.871452	0.152297
cg15208718	0.371852	3.21476	0.0013897	0.871452	0.244201
cg06885196	0.0695248	3.21462	0.00139017	0.871452	0.199077
cg26728709	0.164438	3.2133	0.00139664	0.871452	0.177161
cg24995855	0.107632	3.21274	0.00139913	0.871452	0.335414
cg13515104	-0.0950128	-3.21131	0.00140596	0.871452	0.165928
cg24650120	-0.231868	-3.211	0.00140867	0.871452	0.24925
cg27429195	-0.15311	-3.20933	0.00141603	0.871452	0.350947
cg08233624	0.120501	3.20885	0.00141779	0.871452	0.182751
cg20324209	-0.111233	-3.20884	0.00141786	0.871452	0.176038
cg06405341	0.128765	3.20853	0.00141936	0.871452	0.131825
cg15734436	-0.0868489	-3.20847	0.00141964	0.871452	0.174229
cg01365922	0.15543	3.20833	0.0014203	0.871452	0.114518
cg17176981	0.137304	3.20824	0.00142074	0.871452	0.206
cg19582686	0.128131	3.20822	0.00142083	0.871452	0.236327
cg00941431	-0.137314	-3.20826	0.00142083	0.871452	0.104124
cg21834116	-0.070389	-3.20751	0.00142445	0.871452	0.183902
cg19099049	0.101185	3.20707	0.00142644	0.871452	0.128854
cg11609780	0.135435	3.20692	0.00142717	0.871452	0.142626
cg16273546	-0.296485	-3.20649	0.00142927	0.871452	0.621779
cg12160258	0.0933309	3.20632	0.00143007	0.871452	0.166977
cg05323533	0.0762061	3.2061	0.00143116	0.871452	0.163991
cg14748746	0.0975843	3.20403	0.00144129	0.871452	0.153146
cg21087701	0.232707	3.20402	0.00144133	0.871452	0.162974
cg05552616	-0.149247	-3.20325	0.00144561	0.871452	0.114639
cg26250093	0.163601	3.20274	0.00144778	0.871452	0.145435
cg19047265	0.124381	3.20251	0.00144876	0.871452	0.22501
cg08764509	0.180658	3.20231	0.00144974	0.871452	0.217447
cg12923936	-0.155166	-3.20213	0.0014506	0.871452	0.251908
cg08501292	0.309954	3.20213	0.00145081	0.871452	0.132795
cg14757717	0.500841	3.20268	0.001451	0.871452	0.18819
cg03956464	0.125321	3.2019	0.00145173	0.871452	0.269062
cg16952974	0.0850919	3.20144	0.00145457	0.871452	0.14469
cg22247250	0.0859255	3.20068	0.00145779	0.871452	0.208499
cg24029509	0.133422	3.20013	0.00146068	0.871452	0.358475
cg23090824	0.1174	3.1997	0.00146283	0.871452	0.191632
cg09804509	0.0815936	3.19943	0.00146401	0.871452	0.205255
cg20124078	0.156069	3.19901	0.00146608	0.871452	0.122267
cg00945089	-0.0946288	-3.19871	0.0014676	0.871452	0.149305
cg03392753	0.183084	3.19782	0.0014724	0.871452	0.220575
cg21886089	-0.0875386	-3.19726	0.00147484	0.871452	0.125683
cg26205842	0.116655	3.19688	0.00147675	0.871452	0.112088
cg14636579	0.147919	3.19601	0.00148112	0.871452	0.377431
cg15094228	0.880297	3.19576	0.00148234	0.871452	0.90179
cg25534601	0.125345	3.19576	0.00148238	0.871452	0.323677
cg26790247	0.0937855	3.19517	0.00148535	0.871452	0.109799
cg20059151	0.0922818	3.19492	0.00148675	0.871452	0.177697
cg10032534	-0.3667	-3.19455	0.00148863	0.871452	0.132586
cg05365199	0.0698422	3.1943	0.00148991	0.871452	0.215512
cg00762003	0.628756	3.1942	0.0014906	0.871452	0.883645
cg11961344	-0.106953	-3.19402	0.00149113	0.871452	0.130536
cg11729174	0.0993084	3.19352	0.00149404	0.871452	0.189957
cg05134928	-0.134105	-3.19326	0.00149515	0.871452	0.126366
cg16473797	-0.0524367	-3.19245	0.00149909	0.871452	0.114444
cg05346902	0.0431274	3.19157	0.00150376	0.871452	0.132054
cg10276098	0.111038	3.19141	0.00150443	0.871452	0.386221
cg14776518	0.154581	3.18995	0.00151189	0.871452	0.226341
cg08548559	-0.13794	-3.18961	0.00151364	0.871452	0.230798
cg13200556	0.110591	3.18913	0.00151609	0.871452	0.228778
cg01652021	-0.278999	-3.18919	0.0015182	0.871452	0.46822
cg13540895	0.241684	3.18678	0.00152874	0.871452	0.121863
cg15952586	0.625883	3.18612	0.00153219	0.871452	0.144565
cg23343291	0.110481	3.18583	0.00153314	0.871452	0.180229
cg06955954	-0.620735	-3.18574	0.00153719	0.871452	0.934142
cg15586439	0.0823077	3.18495	0.00153771	0.871452	0.11704
cg23944675	0.0806332	3.18405	0.00154241	0.871452	0.129382
cg11320791	0.104786	3.18391	0.00154333	0.871452	0.118059
cg11021551	0.0886886	3.1838	0.00154371	0.871452	0.224944
cg00846554	0.0696341	3.18366	0.00154443	0.871452	0.218615
cg07967042	0.0596764	3.18345	0.00154552	0.871452	0.113248
cg14213515	0.105864	3.18294	0.00154818	0.871452	0.145442
cg07532986	-0.188115	-3.18284	0.00154926	0.871452	0.187037
cg21143225	0.0740487	3.18191	0.0015536	0.871452	0.118915
cg12363011	0.0667904	3.18183	0.00155404	0.871452	0.107512
cg23027387	0.148954	3.18152	0.00155568	0.871452	0.315516
cg23451336	0.374324	3.18075	0.00155973	0.871452	0.178824
cg04332373	0.0728873	3.17996	0.00156392	0.871452	0.120029
cg02273827	0.101348	3.1798	0.00156475	0.871452	0.25289
cg00921669	0.109249	3.17859	0.00157115	0.871452	0.286234
cg05470497	0.0472648	3.17853	0.00157146	0.871452	0.100281
cg08918562	-0.0838212	-3.17844	0.00157233	0.871452	0.196466
cg23057009	0.0856175	3.17824	0.00157304	0.871452	0.155163
cg04973426	0.0853633	3.17813	0.00157363	0.871452	0.245161
cg06373583	-0.139574	-3.17764	0.00157623	0.871452	0.356051
cg18561976	0.128994	3.17709	0.00157917	0.871452	0.367961
cg03005003	0.108612	3.17629	0.00158341	0.871452	0.158407
cg07129921	0.0684624	3.17573	0.0015866	0.871452	0.109444
cg10936323	-0.210945	-3.17486	0.00159184	0.871452	0.183996
cg06011976	0.114985	3.17466	0.00159236	0.871452	0.14308
cg24832774	0.0923566	3.17417	0.0015952	0.871452	0.152469
cg06871772	-0.0902519	-3.17395	0.00159597	0.871452	0.101372
cg01731811	0.149626	3.17404	0.00159609	0.871452	0.128886
cg16163850	0.0635359	3.17393	0.00159665	0.871452	0.181206
cg11058916	0.130977	3.17372	0.00159723	0.871452	0.339902
cg13785196	-0.0526241	-3.17364	0.00159765	0.871452	0.17101
cg04931690	0.310607	3.17358	0.00159796	0.871452	0.242644
cg03948727	-0.127192	-3.17334	0.00159926	0.871452	0.130375
cg21250433	0.057305	3.17303	0.00160096	0.871452	0.243004
cg04080791	0.583951	3.17276	0.00160374	0.871452	0.432457
cg01077257	0.0710103	3.17213	0.00160582	0.871452	0.143357
cg16658618	0.0667324	3.17155	0.00160897	0.871452	0.128992
cg05891765	0.124144	3.1713	0.0016103	0.871452	0.308293
cg27628372	0.0763468	3.17123	0.00161145	0.871452	0.173911
cg13804561	0.098397	3.17021	0.00161663	0.871452	0.230406
cg06533679	-0.0883659	-3.17009	0.00161689	0.871452	0.131339
cg18567504	0.0457509	3.16991	0.00161792	0.871452	0.148074
cg27442613	0.0806724	3.16896	0.00162308	0.871452	0.102166
cg15243205	-0.119078	-3.16883	0.0016238	0.871452	0.100375
cg22879289	-0.0856655	-3.16841	0.00162611	0.871452	0.131322
cg03471894	-0.135949	-3.16772	0.00162991	0.871452	0.173867
cg07511008	-0.77649	-3.16764	0.00163034	0.871452	0.164931
cg11473238	-0.144688	-3.16722	0.0016328	0.871452	0.147853
cg06718625	0.0999041	3.16617	0.00163859	0.871452	0.264745
cg20051808	-0.11778	-3.16563	0.00164142	0.871452	0.106632
cg21380925	-0.184491	-3.16499	0.00164516	0.871452	0.336363
cg27118929	0.118146	3.16479	0.00164608	0.871452	0.246735
cg02927618	-0.0969167	-3.16476	0.00164623	0.871452	0.22963
cg16625054	0.175419	3.1644	0.00164824	0.871452	0.166337
cg19279973	0.149509	3.16387	0.00165119	0.871452	0.160796
cg20326786	0.0776674	3.16357	0.00165287	0.871452	0.233961
cg17332705	0.107918	3.1634	0.00165376	0.871452	0.14081
cg13298682	0.114534	3.16268	0.00165782	0.871452	0.107076
cg08995325	-0.492703	-3.16261	0.00165818	0.871452	0.381973
cg01498829	0.0719085	3.16266	0.00165846	0.871452	0.282556
cg25422411	0.0760033	3.16239	0.00165944	0.871452	0.102976
cg26237810	-0.458674	-3.16198	0.00166193	0.871452	0.771256
cg22845187	-0.110084	-3.16174	0.00166305	0.871452	0.150123
cg19995126	-0.278136	-3.16169	0.00166467	0.871452	0.380328
cg26987584	0.0801233	3.16051	0.00167054	0.871452	0.104627
cg27160614	0.105675	3.16039	0.00167064	0.871452	0.192377
cg15977002	-0.16359	-3.15984	0.00167375	0.871452	0.127514
cg14729755	0.060731	3.15932	0.00167684	0.871452	0.168277
cg26266618	0.0868599	3.15912	0.00167797	0.871452	0.121988
cg09243591	-0.371465	-3.1588	0.00168015	0.871452	0.14186
cg13442833	-0.088787	-3.15856	0.00168112	0.871452	0.229352
cg24346204	-0.109278	-3.1578	0.00168526	0.871452	0.126388
cg10764440	0.0875598	3.15714	0.0016892	0.871452	0.189646
cg15334837	0.0777121	3.15691	0.0016903	0.871452	0.228172
cg25608490	0.0849483	3.1565	0.00169264	0.871452	0.123395
cg21049294	-0.429495	-3.1557	0.00169795	0.871452	0.161843
cg04637490	0.120471	3.15532	0.00169935	0.871452	0.133701
cg02736255	0.0694596	3.15519	0.00170007	0.871452	0.164726
cg19084031	0.325621	3.15469	0.00170297	0.871452	0.417043
cg10026389	0.12207	3.15449	0.00170447	0.871452	0.252552
cg25956080	-0.0633298	-3.15436	0.00170506	0.871452	0.120686
cg16851074	0.0836114	3.15385	0.00170798	0.871452	0.243438
cg04664595	0.081265	3.15341	0.00171049	0.871452	0.21326
cg24677127	0.0648782	3.15321	0.00171162	0.871452	0.172139
cg09207613	0.0795565	3.15303	0.00171267	0.871452	0.155528
cg24343823	0.0723871	3.15275	0.00171406	0.871452	0.223741
cg22102888	0.0603151	3.15246	0.00171574	0.871452	0.25816
cg20829955	0.10854	3.15187	0.00171936	0.871452	0.212251
cg02562761	0.174476	3.15069	0.00172598	0.871452	0.235183
cg12580445	-0.372059	-3.15031	0.00172817	0.871452	0.555046
cg08232251	-0.753528	-3.14979	0.00173218	0.871452	0.293931
cg01124294	0.0673786	3.14939	0.00173351	0.871452	0.172347
cg13624833	0.0622976	3.14888	0.00173652	0.871452	0.191127
cg15963095	-0.15197	-3.14881	0.00173688	0.871452	0.10124
cg14547393	0.118696	3.14842	0.00173917	0.871452	0.202272
cg04655481	0.0679747	3.14767	0.00174355	0.871452	0.222345
cg15025140	0.0613085	3.14753	0.00174441	0.871452	0.157044
cg05620326	0.102296	3.14752	0.00174442	0.871452	0.359082
cg04155086	0.116384	3.14677	0.00174885	0.871452	0.285415
cg27317416	-0.184461	-3.14655	0.00175011	0.871452	0.17958
cg13606421	0.080771	3.14652	0.00175048	0.871452	0.227642
cg12831086	0.100447	3.14591	0.00175388	0.871452	0.131686
cg00940659	-0.068909	-3.14415	0.00176427	0.871452	0.157679
cg09576787	0.110311	3.14381	0.00176648	0.871452	0.283294
cg10861541	0.120061	3.14352	0.00176797	0.871452	0.306532
cg27260617	0.132325	3.14244	0.00177441	0.871452	0.153642
cg23691216	-0.078576	-3.14217	0.00177619	0.871452	0.138425
cg18130688	0.14734	3.14193	0.00177764	0.871452	0.206444
cg06820541	-0.245127	-3.14059	0.00178541	0.871452	0.122496
cg18195119	-0.344883	-3.1403	0.00178713	0.871452	0.211019
cg27618398	-0.142094	-3.14033	0.00178843	0.871452	0.110658
cg06351520	0.0949705	3.14	0.00178917	0.871452	0.215383
cg11483327	-0.198655	-3.13997	0.00178933	0.871452	0.525005
cg19393605	-0.0783377	-3.13971	0.00179108	0.871452	0.118348
cg16520030	0.115267	3.1393	0.00179313	0.871452	0.343366
cg15368423	-0.115183	-3.13926	0.00179337	0.871452	0.100432
cg16959787	0.121545	3.13912	0.00179424	0.871452	0.130071
cg06100447	0.426935	3.13904	0.00179531	0.871452	0.440679
cg03762237	-0.116928	-3.13879	0.00179622	0.871452	0.112538
cg24683623	0.0653537	3.1383	0.00179917	0.871452	0.177868
cg00938920	-0.557771	-3.13814	0.00180031	0.871452	0.200261
cg14406226	-0.17203	-3.1381	0.00180059	0.871452	0.248837
cg01396157	0.0663391	3.13739	0.00180464	0.871452	0.174219
cg25352134	0.132637	3.13706	0.0018066	0.871452	0.119082
cg18268962	0.101809	3.13705	0.0018071	0.871452	0.156428
cg03585096	-0.0912258	-3.13584	0.00181404	0.871452	0.278362
cg02986508	0.0628966	3.13555	0.00181576	0.871452	0.100111
cg06856648	0.0804	3.13535	0.00181739	0.871452	0.233033
cg27163614	0.13527	3.13487	0.00181989	0.871452	0.139694
cg09729172	0.0767323	3.1347	0.00182094	0.871452	0.181272
cg21899640	0.101333	3.13428	0.0018235	0.871452	0.183162
cg01123478	0.168331	3.13386	0.00182603	0.871452	0.2228
cg11355217	-0.0737061	-3.13373	0.00182706	0.871452	0.115141
cg10544660	-0.714749	-3.13367	0.0018272	0.871452	0.128026
cg01433468	-0.133964	-3.13241	0.00183516	0.871452	0.118705
cg23698649	-0.212384	-3.13081	0.00184476	0.871452	0.17059
cg13611636	-0.160041	-3.1306	0.00184605	0.871452	0.200599
cg22068740	-0.178721	-3.12951	0.00185281	0.871452	0.146105
cg05604302	-0.114263	-3.12922	0.00185523	0.871452	0.125862
cg01402764	0.128011	3.12886	0.00185699	0.871452	0.287654
cg15111469	-0.220097	-3.12836	0.0018599	0.871452	0.481935
cg20600845	0.106597	3.12806	0.00186196	0.871452	0.104808
cg16472569	-0.207847	-3.12783	0.00186323	0.871452	0.244851
cg19788128	0.0695225	3.12753	0.00186548	0.871452	0.254853
cg05757475	0.130064	3.12718	0.00186724	0.871452	0.1931
cg21834512	0.289459	3.12696	0.00186861	0.871452	0.182247
cg09041111	0.61095	3.12699	0.0018699	0.871452	0.126313
cg13485112	0.0629581	3.12637	0.00187248	0.871452	0.134483
cg15413648	0.186734	3.12621	0.00187327	0.871452	0.121197
cg06473827	0.0934483	3.12613	0.00187401	0.871452	0.116202
cg04528382	0.0473188	3.12607	0.00187416	0.871452	0.100057
cg10899887	0.0874718	3.12512	0.00188013	0.871452	0.229856
cg11643186	0.181196	3.1246	0.00188356	0.871452	0.237605
cg14393148	0.0551855	3.1245	0.00188404	0.871452	0.161125
cg23205474	0.105458	3.1239	0.00188799	0.871452	0.209569
cg11029358	0.0829723	3.12368	0.00188915	0.871452	0.223377
cg14962584	0.0809085	3.12241	0.00189716	0.871452	0.153129
cg02053529	0.0766738	3.12215	0.00189884	0.871452	0.21906
cg18279295	0.487115	3.12172	0.00190157	0.871452	0.156316
cg07496959	0.0503007	3.12162	0.00190216	0.871452	0.162013
cg22181201	0.111946	3.1213	0.00190441	0.871452	0.255815
cg01861613	0.218713	3.12132	0.00190452	0.871452	0.311906
cg20004827	0.0506927	3.11927	0.00191713	0.871452	0.14746
cg06001519	0.153947	3.11909	0.00191826	0.871452	0.170697
cg01821854	0.0768265	3.11881	0.00192006	0.871452	0.129109
cg00206463	-0.138043	-3.1186	0.0019214	0.871452	0.196331
cg16332596	0.310496	3.11853	0.00192185	0.871452	0.147891
cg07705294	0.121132	3.1178	0.00192649	0.871452	0.324886
cg13459779	-0.087882	-3.11761	0.00192775	0.871452	0.127721
cg24675735	0.0871448	3.11744	0.00192885	0.871452	0.117336
cg11581446	0.231749	3.11742	0.00193046	0.871452	0.152079
cg24809557	0.0838717	3.11714	0.00193096	0.871452	0.284553
cg27367535	0.230041	3.117	0.00193162	0.871452	0.303658
cg04002181	0.0777127	3.11665	0.00193393	0.871452	0.228915
cg06569748	-0.13339	-3.11619	0.00193708	0.871452	0.126963
cg23446046	-0.1105	-3.11606	0.0019381	0.871452	0.132891
cg00091794	0.0667088	3.11566	0.00194048	0.871452	0.188629
cg22505977	0.093929	3.11552	0.00194121	0.871452	0.227401
cg04285652	0.0838689	3.11501	0.00194471	0.871452	0.130982
cg26348614	-0.326303	-3.11486	0.00194544	0.871452	0.121269
cg21758338	0.0788566	3.11459	0.00194722	0.871452	0.205029
cg05459750	-0.144413	-3.11457	0.0019473	0.871452	0.174239
cg10712573	0.0480615	3.11437	0.00194906	0.871452	0.15709
cg27255101	0.0751727	3.11377	0.00195254	0.871452	0.151119
cg00910586	0.180887	3.11381	0.0019531	0.871452	0.326829
cg03880407	0.0567333	3.11323	0.00195604	0.871452	0.175012
cg24593707	-0.0924338	-3.11324	0.0019562	0.871452	0.217509
cg04543273	0.0452687	3.1126	0.00196014	0.871452	0.141195
cg16156751	0.0575602	3.11232	0.00196197	0.871452	0.196024
cg06797734	0.0579094	3.11193	0.00196446	0.871452	0.118134
cg12234789	-0.0932036	-3.11143	0.00196776	0.871452	0.14582
cg17078190	-0.139918	-3.11127	0.00196902	0.871452	0.136308
cg27242341	0.252737	3.1113	0.00197081	0.871452	0.185742
cg05825400	0.0608709	3.11089	0.00197126	0.871452	0.182601
cg25036022	0.0729361	3.11089	0.00197128	0.871452	0.207333
cg23455102	0.129527	3.11062	0.00197308	0.871452	0.119254
cg06232209	0.113272	3.11053	0.00197385	0.871452	0.125721
cg19164131	-0.101012	-3.11048	0.00197397	0.871452	0.185069
cg14362758	0.176523	3.11015	0.00197616	0.871452	0.107168
cg26077214	0.069683	3.10935	0.00198159	0.871452	0.157184
cg05935904	-0.397258	-3.10917	0.0019828	0.871452	0.203835
cg08317416	0.0804786	3.10904	0.00198345	0.871452	0.178054
cg02658693	0.0987185	3.10907	0.00198369	0.871452	0.133485
cg00445790	0.0613148	3.10872	0.00198554	0.871452	0.121093
cg03200890	0.18739	3.10864	0.00198653	0.871452	0.1519
cg00255660	0.0617084	3.10825	0.00198863	0.871452	0.222037
cg26884667	0.0816984	3.10777	0.00199178	0.871452	0.195741
cg14342218	-0.166917	-3.10755	0.0019933	0.871452	0.132998
cg21899940	0.104512	3.10609	0.00200294	0.871452	0.171183
cg09923978	-0.162676	-3.106	0.00200375	0.871452	0.115093
cg08660994	0.129481	3.10594	0.00200436	0.871452	0.343144
cg25227803	0.0845551	3.10584	0.00200459	0.871452	0.208416
cg12751817	-0.377354	-3.1059	0.0020049	0.871452	0.21422
cg25734651	0.187594	3.10512	0.0020094	0.871452	0.407375
cg06852544	0.512333	3.10499	0.00201072	0.871452	0.693766
cg13032616	0.0578959	3.1049	0.00201087	0.871452	0.126904
cg00155454	0.124963	3.10425	0.00201541	0.871452	0.177608
cg08821702	-0.10592	-3.1041	0.00201706	0.871452	0.106009
cg00747647	-0.10237	-3.10391	0.00201748	0.871452	0.218668
cg24305122	0.887027	3.10404	0.00201773	0.871452	0.300646
cg16704813	-0.0948378	-3.10384	0.00201792	0.871452	0.105218
cg01317388	0.134882	3.10361	0.00201992	0.871452	0.228483
cg21576842	0.124153	3.10317	0.00202243	0.871452	0.143497
cg19467890	0.0865569	3.10266	0.00202585	0.871452	0.278873
cg17178485	-0.0645675	-3.10232	0.00202838	0.871452	0.10923
cg17050806	0.337313	3.10203	0.0020301	0.871452	0.421174
cg17560699	-0.288988	-3.10303	0.00203338	0.871452	0.358933
cg14648596	0.174358	3.10128	0.00203581	0.871452	0.222274
cg26486036	0.0976931	3.10087	0.00203812	0.871452	0.246965
cg09331206	0.0479873	3.10079	0.00203892	0.871452	0.148061
cg00683245	0.0992075	3.10026	0.002042	0.871452	0.281453
cg10791971	-0.240426	-3.1002	0.00204265	0.871452	0.125769
cg04032605	-0.293843	-3.09947	0.00204737	0.871452	0.258055
cg16837680	0.129302	3.09928	0.00204867	0.871452	0.161064
cg22822698	0.111484	3.09915	0.00205001	0.871452	0.23319
cg12399557	-0.128531	-3.09869	0.00205266	0.871452	0.164541
cg15295012	-0.169227	-3.09868	0.00205338	0.871452	0.329117
cg27302421	0.10098	3.09849	0.00205427	0.871452	0.3584
cg08240847	0.0968975	3.09751	0.00206096	0.871452	0.273429
cg04853319	0.0630385	3.09743	0.00206125	0.871452	0.324063
cg19585646	-0.129815	-3.09722	0.0020627	0.871452	0.271211
cg19650936	-0.190343	-3.09695	0.00206455	0.871452	0.34107
cg16192197	0.0740168	3.09694	0.00206461	0.871452	0.214157
cg12457238	0.0721542	3.09697	0.00206464	0.871452	0.151712
cg10926256	-0.105372	-3.09642	0.00206838	0.871452	0.135686
cg07559942	-0.132901	-3.09613	0.00207058	0.871452	0.272201
cg09011861	0.0984887	3.09599	0.0020711	0.871452	0.102946
cg14318940	0.0888002	3.09562	0.00207364	0.871452	0.174558
cg05744665	0.0757992	3.0956	0.00207375	0.871452	0.241105
cg00019196	0.225443	3.09558	0.00207392	0.871452	0.338351
cg17906245	0.106213	3.09558	0.00207393	0.871452	0.14134
cg26430041	-0.0831331	-3.09555	0.00207411	0.871452	0.145218
cg07110166	-0.146565	-3.09543	0.00207498	0.871452	0.193013
cg11688944	0.083978	3.09542	0.00207498	0.871452	0.21464
cg02877240	0.110163	3.0952	0.00207654	0.871452	0.390096
cg15763498	-0.120033	-3.09476	0.00207977	0.871452	0.17742
cg06778662	-0.0766072	-3.09451	0.00208149	0.871452	0.124914
cg07493922	0.0906325	3.09435	0.00208239	0.871452	0.115735
cg10547260	0.0792216	3.09413	0.00208435	0.871452	0.260329
cg20237683	0.166202	3.09405	0.00208441	0.871452	0.481548
cg10111211	0.0495141	3.09389	0.00208554	0.871452	0.148294
cg21949680	-0.126452	-3.09359	0.00208763	0.871452	0.121558
cg09333820	0.100036	3.09343	0.00208873	0.871452	0.257337
cg12776836	0.0846703	3.09299	0.00209173	0.871452	0.226056
cg16298226	-0.155981	-3.09278	0.00209342	0.871452	0.188414
cg17903776	0.101809	3.09272	0.00209366	0.871452	0.125549
cg22584104	0.0982919	3.09261	0.00209439	0.871452	0.318705
cg25738505	-0.421194	-3.09248	0.00209532	0.871452	0.677229
cg08138574	0.16354	3.09204	0.00209853	0.871452	0.10057
cg24259560	0.208456	3.09191	0.00209922	0.871452	0.117933
cg14428587	0.113109	3.0917	0.00210089	0.871452	0.11439
cg24871922	0.0598474	3.09136	0.00210307	0.871452	0.301823
cg11347411	0.238835	3.09124	0.00210436	0.871452	0.186784
cg10471794	0.102825	3.09094	0.00210641	0.871452	0.103648
cg23981142	0.132438	3.09031	0.00211039	0.871452	0.140303
cg06668837	0.11111	3.0903	0.00211064	0.871452	0.377765
cg10435021	0.0601968	3.09022	0.00211096	0.871452	0.12477
cg14732054	-0.154172	-3.08987	0.00211365	0.871452	0.308855
cg11804239	0.146574	3.08953	0.00211582	0.871452	0.352121
cg05340744	0.245674	3.08944	0.00211646	0.871452	0.396299
cg06288340	0.0865851	3.08913	0.00211863	0.871452	0.209068
cg26507427	0.0616725	3.08874	0.00212199	0.871452	0.195077
cg00073543	0.096006	3.08847	0.00212344	0.871452	0.112842
cg13077784	0.050608	3.08816	0.00212543	0.871452	0.15455
cg14992527	-0.549606	-3.0875	0.00213007	0.871452	0.870537
cg14660531	-0.140288	-3.08728	0.00213155	0.871452	0.107514
cg03490331	0.0611782	3.0865	0.00213728	0.871452	0.104187
cg15854548	-0.512737	-3.08652	0.00213828	0.871452	0.25039
cg00232868	0.107308	3.08632	0.00213906	0.871452	0.346859
cg22662548	0.129959	3.08589	0.0021423	0.871452	0.237337
cg14247903	0.101885	3.08568	0.00214284	0.871452	0.182869
cg10634775	0.0466285	3.08565	0.00214332	0.871452	0.13383
cg16886625	0.0642983	3.08465	0.00215014	0.871452	0.202619
cg05031424	0.0667009	3.08387	0.00215572	0.871452	0.119557
cg12243570	0.135561	3.08342	0.00215891	0.871452	0.131527
cg03252718	0.105049	3.08232	0.00216677	0.871452	0.156006
cg03470856	-0.173721	-3.08213	0.00216857	0.871452	0.125977
cg14477973	0.0729597	3.08194	0.00216944	0.871452	0.144698
cg27174822	0.0944123	3.08176	0.00217076	0.871452	0.291378
cg14403309	0.459103	3.08166	0.00217214	0.871452	0.246914
cg09160589	0.091563	3.0812	0.00217477	0.871452	0.279167
cg17737621	0.0875794	3.08116	0.00217502	0.871452	0.123911
cg13222036	0.124488	3.08081	0.00217755	0.871452	0.124902
cg19663235	-0.0920296	-3.08079	0.0021782	0.871452	0.125477
cg00034769	0.0596959	3.08052	0.00217966	0.871452	0.181439
cg05928239	0.0833164	3.08044	0.00218025	0.871452	0.120702
cg15970392	0.171947	3.08039	0.00218059	0.871452	0.247713
cg25150520	0.0487607	3.08013	0.00218245	0.871452	0.117384
cg15412826	-0.497242	-3.08011	0.00218261	0.871452	0.401498
cg16930880	0.0503702	3.07998	0.00218355	0.871452	0.128545
cg21465162	0.247435	3.07997	0.0021836	0.871452	0.104213
cg21208028	-0.0984694	-3.0799	0.00218431	0.871452	0.213159
cg15137954	0.405995	3.07957	0.00218651	0.871452	0.583606
cg16682135	-0.0813363	-3.07931	0.00218834	0.871452	0.116112
cg05416180	0.156129	3.07903	0.00219034	0.871452	0.205035
cg05659160	-0.155434	-3.07902	0.00219043	0.871452	0.102749
cg09936992	-0.0824247	-3.07804	0.00219754	0.871452	0.140246
cg04765303	-0.142484	-3.07794	0.00219827	0.871452	0.13692
cg10038168	0.155565	3.07787	0.00219873	0.871452	0.181637
cg09133563	0.156027	3.07695	0.00220544	0.871452	0.103092
cg12578084	0.0762834	3.07683	0.002207	0.871452	0.377655
cg08364654	0.128132	3.07672	0.00220729	0.871452	0.359348
cg17831582	-0.133724	-3.07661	0.0022079	0.871452	0.13484
cg00104484	0.488194	3.07655	0.00220836	0.871452	0.518631
cg01064365	0.0886387	3.07649	0.00220902	0.871452	0.256584
cg10079927	-0.0700289	-3.07646	0.00220924	0.871452	0.246416
cg09922895	0.333011	3.07607	0.00221228	0.871452	0.260741
cg11189868	-0.467975	-3.07597	0.00221255	0.871452	0.752509
cg07517476	-0.0796981	-3.07596	0.00221264	0.871452	0.160222
cg14825462	0.0663059	3.07589	0.0022131	0.871452	0.113952
cg05416809	-0.148879	-3.07531	0.00221761	0.871452	0.113871
cg13422003	0.0830659	3.07521	0.00221809	0.871452	0.342338
cg02349146	0.0888943	3.07481	0.00222123	0.871452	0.254175
cg24409539	0.0734374	3.07422	0.00222535	0.871452	0.113155
cg16083679	-0.172798	-3.07406	0.00222675	0.871452	0.117169
cg19843353	-0.132526	-3.07391	0.00222757	0.871452	0.397778
cg06187080	-0.0532229	-3.07389	0.00222774	0.871452	0.102702
cg14633910	-0.722929	-3.07388	0.00222783	0.871452	0.261022
cg18807499	0.0661876	3.07386	0.00222887	0.871452	0.107147
cg26349094	0.120663	3.0736	0.00222989	0.871452	0.180951
cg00070162	-0.24225	-3.07376	0.00223013	0.871452	0.10074
cg16217368	0.123136	3.07331	0.00223244	0.871452	0.362773
cg15049101	0.117415	3.07306	0.0022338	0.871452	0.205395
cg23826829	0.112028	3.07267	0.00223692	0.871452	0.101057
cg07690910	0.295601	3.07262	0.00223703	0.871452	0.327483
cg11342645	0.0659366	3.0721	0.00224089	0.871452	0.172581
cg14372705	-0.205051	-3.07201	0.00224154	0.871452	0.443208
cg25293835	0.0806698	3.07186	0.00224264	0.871452	0.221816
cg06246888	0.0831998	3.07159	0.00224464	0.871452	0.259537
cg21807305	-0.159846	-3.07098	0.00224914	0.871452	0.142072
cg06017249	0.205721	3.07036	0.00225425	0.871452	0.272447
cg03709307	0.0649273	3.06939	0.00226093	0.871452	0.101748
cg17227774	-0.271667	-3.06954	0.00226146	0.871452	0.504372
cg22462726	-0.303332	-3.06921	0.00226227	0.871452	0.285573
cg18544415	-0.11356	-3.06847	0.00226775	0.871452	0.10793
cg26118208	0.0873183	3.0683	0.00226904	0.871452	0.103045
cg23725986	0.115741	3.0681	0.00227052	0.871452	0.283485
cg01126962	-0.412876	-3.06801	0.00227144	0.871452	0.24097
cg02323098	-1.06831	-3.06769	0.0022736	0.871452	0.946443
cg02973961	0.103539	3.06754	0.0022747	0.871452	0.277973
cg01921126	-0.112681	-3.06714	0.00227768	0.871452	0.300646
cg21947254	0.0992654	3.06573	0.00228828	0.871452	0.262868
cg07732348	0.138735	3.0651	0.002293	0.871452	0.108035
cg02051616	0.06877	3.06497	0.00229402	0.871452	0.150305
cg09207457	-0.0991131	-3.06503	0.00229494	0.871452	0.122841
cg00868206	-0.145919	-3.06429	0.0022991	0.871452	0.262866
cg06181508	0.0656723	3.06426	0.00229956	0.871452	0.102236
cg10974980	0.101774	3.06413	0.00230033	0.871452	0.121395
cg12782676	0.112615	3.06418	0.00230041	0.871452	0.133933
cg22916986	0.125388	3.06407	0.00230079	0.871452	0.101488
cg04334429	0.19602	3.06436	0.00230101	0.871452	0.112355
cg10652359	0.20932	3.06325	0.00230695	0.871452	0.107353
cg22900035	-0.118733	-3.06323	0.00230713	0.871452	0.139225
cg24492304	0.335506	3.06386	0.0023094	0.871452	0.303323
cg08128007	0.163421	3.06272	0.002311	0.871452	0.250528
cg17947198	0.112508	3.06238	0.002314	0.871452	0.320366
cg13870990	0.0772672	3.06227	0.0023144	0.871452	0.185533
cg11271830	-0.28581	-3.06203	0.00231619	0.871452	0.156542
cg26008369	-0.135101	-3.0619	0.00231723	0.871452	0.153203
cg08077269	0.1129	3.06173	0.00231847	0.871452	0.170812
cg11261234	0.0569286	3.06166	0.00231901	0.871452	0.191115
cg05254996	0.0747017	3.06165	0.00231907	0.871452	0.222899
cg12440046	-0.45074	-3.06078	0.00232572	0.871452	0.322622
cg20819150	0.224546	3.06019	0.00233023	0.871452	0.166278
cg06523516	-0.0383861	-3.05977	0.00233341	0.871452	0.119985
cg26443724	-0.0921154	-3.05958	0.00233489	0.871452	0.125499
cg06804564	0.110121	3.05951	0.00233543	0.871452	0.122914
cg16148897	0.254428	3.0594	0.00233629	0.871452	0.413954
cg12320522	0.127055	3.05934	0.00233694	0.871452	0.180926
cg16101739	0.0825202	3.05905	0.00233916	0.871452	0.108844
cg07516483	0.0682638	3.05886	0.00234066	0.871452	0.109061
cg03464514	0.0877117	3.05849	0.00234327	0.871452	0.101129
cg00188579	-0.178302	-3.05842	0.00234375	0.871452	0.18183
cg00714758	-0.738023	-3.05743	0.00235264	0.871452	0.303267
cg18167218	-0.0842817	-3.05719	0.00235349	0.871452	0.105655
cg04011414	-0.0893046	-3.05707	0.00235417	0.871452	0.111248
cg06911348	0.0884729	3.0565	0.00235854	0.871452	0.337563
cg05399434	0.0933851	3.05647	0.00235903	0.871452	0.211976
cg14042799	0.0994477	3.05643	0.00235913	0.871452	0.300904
cg21547628	0.13314	3.05615	0.0023613	0.871452	0.236607
cg04406114	0.053998	3.05544	0.00236676	0.871452	0.192657
cg03738384	-0.101475	-3.05516	0.0023689	0.871452	0.179052
cg12059045	0.251316	3.05493	0.00237073	0.871452	0.522184
cg12614898	0.0804866	3.05472	0.00237232	0.871452	0.209316
cg09779405	0.132555	3.05396	0.00237824	0.871452	0.125916
cg19471031	-0.563091	-3.0534	0.00238307	0.871452	0.191369
cg24501036	0.0423762	3.05336	0.0023832	0.871452	0.152245
cg14117297	0.0627405	3.0533	0.00238336	0.871452	0.147565
cg15468302	0.0574387	3.05316	0.0023845	0.871452	0.200286
cg09449747	-0.565627	-3.05198	0.00239565	0.871452	0.902464
cg00564081	0.0957532	3.05163	0.00239672	0.871452	0.347754
cg13562176	0.121211	3.05081	0.00240286	0.871452	0.109509
cg16183252	-0.0782307	-3.05034	0.00240658	0.871452	0.22537
cg07343418	0.0678663	3.04988	0.00241023	0.871452	0.221287
cg03702209	0.0722256	3.04984	0.00241104	0.871452	0.255069
cg16339097	-0.171513	-3.04958	0.00241253	0.871452	0.140738
cg23715213	0.092928	3.04954	0.00241335	0.871452	0.393132
cg17690296	-0.18167	-3.04947	0.00241345	0.871452	0.486656
cg17241310	0.0678641	3.04943	0.00241374	0.871452	0.171513
cg16075674	-0.178639	-3.0494	0.00241423	0.871452	0.197897
cg08583127	-0.285452	-3.04943	0.00241477	0.871452	0.26688
cg03547840	0.0807628	3.04879	0.00241881	0.871452	0.105373
cg00397871	0.108852	3.04872	0.00241936	0.871452	0.199037
cg09832180	-0.188913	-3.04871	0.00241946	0.871452	0.155817
cg03782827	0.781086	3.04882	0.00241954	0.871452	0.354945
cg25449821	0.0735581	3.04849	0.00242142	0.871452	0.222307
cg03443365	-0.210106	-3.04828	0.00242309	0.871452	0.310499
cg16443146	0.0793622	3.04788	0.00242596	0.871452	0.336409
cg17327997	0.656043	3.04786	0.00242711	0.871452	0.484269
cg05953939	-0.14317	-3.04757	0.00242844	0.871452	0.359736
cg22323744	0.0749144	3.04711	0.00243207	0.871452	0.111351
cg15822155	0.0911294	3.047	0.00243295	0.871452	0.209353
cg27517345	0.0670511	3.0468	0.0024346	0.871452	0.213765
cg11819369	0.44292	3.04692	0.00243514	0.871452	0.214248
cg01357351	-0.147074	-3.04669	0.00243545	0.871452	0.229832
cg10303842	0.100479	3.04668	0.00243549	0.871452	0.165605
cg19936302	-0.256985	-3.04651	0.00243887	0.871452	0.34358
cg05356778	0.127296	3.04611	0.00244006	0.871452	0.258016
cg19165216	-0.0504618	-3.04603	0.0024407	0.871452	0.117655
cg10981111	-0.09925	-3.04608	0.00244107	0.871452	0.218382
cg17327377	0.0917341	3.04594	0.0024419	0.871452	0.199066
cg17263965	0.102292	3.04542	0.00244557	0.871452	0.117554
cg12654519	-0.0574821	-3.0451	0.00244958	0.871452	0.15967
cg08541457	0.123553	3.04484	0.00245022	0.871452	0.287522
cg08500872	0.0654887	3.04359	0.00246025	0.871452	0.110406
cg26184479	0.0571235	3.04331	0.00246268	0.871452	0.250254
cg14383572	0.0987672	3.04307	0.00246464	0.871452	0.254368
cg16628171	-0.120678	-3.04195	0.0024734	0.871452	0.126906
cg04799958	0.0884835	3.04182	0.00247497	0.871452	0.258462
cg15571405	0.157254	3.04152	0.00247715	0.871452	0.153926
cg06718995	-0.243656	-3.04111	0.0024802	0.871452	0.143604
cg08246428	-0.0606615	-3.04053	0.00248488	0.871452	0.175018
cg10635145	0.099201	3.04014	0.00248802	0.871452	0.281229
cg00095396	0.0893785	3.0401	0.00248839	0.871452	0.117493
cg18270217	0.0753257	3.04009	0.00248897	0.871452	0.301038
cg00741432	0.0962749	3.03994	0.00248968	0.871452	0.297723
cg19650300	-0.271679	-3.03951	0.00249345	0.871452	0.102182
cg22741735	-0.379726	-3.03908	0.00249764	0.871452	0.107562
cg22265173	-0.0649001	-3.03894	0.00249827	0.871452	0.235075
cg26091142	0.129677	3.03886	0.00249842	0.871452	0.143302
cg05780100	-0.182827	-3.03878	0.00249909	0.871452	0.17021
cg14203970	-0.369165	-3.03885	0.00250135	0.871452	0.309262
cg24298648	0.180548	3.03821	0.00250374	0.871452	0.107751
cg15866021	0.137667	3.03834	0.00250392	0.871452	0.194432
cg05597349	0.161896	3.03812	0.00250472	0.871452	0.206248
cg04327959	-0.0984518	-3.038	0.00250545	0.871452	0.205476
cg22102770	0.152745	3.0377	0.00250813	0.871452	0.11756
cg26190359	0.0731964	3.03759	0.00250884	0.871452	0.258515
cg03281929	-0.201514	-3.03744	0.00251007	0.871452	0.156504
cg08011023	-0.105447	-3.03736	0.00251194	0.871452	0.175715
cg10242775	0.137493	3.03696	0.002514	0.871452	0.168141
cg09590897	0.0889854	3.03679	0.00251532	0.871452	0.112382
cg03900253	0.0728344	3.03661	0.00251685	0.871452	0.232599
cg15633128	0.0594935	3.03659	0.00251727	0.871452	0.196377
cg14898366	0.10245	3.03654	0.00251744	0.871452	0.277013
cg27022614	0.270174	3.03644	0.00251821	0.871452	0.521905
cg03511628	0.161928	3.03637	0.00251928	0.871452	0.412048
cg24967099	0.0936657	3.03629	0.00251972	0.871452	0.274201
cg00266920	0.092719	3.03624	0.00252013	0.871452	0.163654
cg09411999	0.0648082	3.03617	0.00252042	0.871452	0.234814
cg00779119	-0.280512	-3.0362	0.00252171	0.871452	0.104653
cg06856720	0.0842938	3.03596	0.00252213	0.871452	0.220936
cg10524053	0.462516	3.03587	0.00252292	0.871452	0.228598
cg17464591	0.112889	3.03584	0.00252363	0.871452	0.300859
cg17367643	0.063073	3.03575	0.00252386	0.871452	0.198817
cg13085507	-0.0965208	-3.03573	0.00252406	0.871452	0.274336
cg13470504	0.0858236	3.03548	0.00252632	0.871452	0.161039
cg11236841	0.149168	3.03545	0.00252634	0.871452	0.12605
cg17424452	0.0709378	3.03526	0.00252792	0.871452	0.113054
cg26879891	0.0906179	3.03516	0.00252874	0.871452	0.105861
cg03447361	-0.121023	-3.03445	0.00253461	0.871452	0.113495
cg07251788	0.309752	3.03415	0.00253761	0.871452	0.372145
cg26687842	0.0758851	3.03352	0.00254223	0.871452	0.203865
cg07986907	0.0744102	3.0334	0.00254324	0.871452	0.238673
cg20907806	0.0873633	3.03335	0.00254366	0.871452	0.150203
cg21555240	0.488139	3.03325	0.00254504	0.871452	0.134363
cg06559355	-0.351008	-3.03321	0.00254531	0.871452	0.352653
cg12149911	0.0774014	3.03312	0.00254558	0.871452	0.103256
cg03217690	-0.155728	-3.03297	0.00254708	0.871452	0.167007
cg21871781	-0.0900378	-3.03278	0.00254837	0.871452	0.192213
cg18563464	0.136181	3.03246	0.00255104	0.871452	0.427691
cg22768129	0.0686361	3.03228	0.00255255	0.871452	0.185623
cg19243788	-0.0449916	-3.03147	0.00255925	0.872999	0.105172
cg12742889	0.102979	3.0306	0.00256657	0.874628	0.180097
cg12777588	0.111344	3.0303	0.00256928	0.874628	0.264834
cg07021854	0.0559154	3.02985	0.0025728	0.874628	0.249207
cg19635884	0.361246	3.02896	0.00258075	0.874628	0.517636
cg16319085	0.0934568	3.02879	0.00258167	0.874628	0.258244
cg05955352	0.081603	3.02835	0.00258566	0.874628	0.183718
cg23041169	0.0812485	3.0282	0.00258692	0.874628	0.266973
cg03271007	0.0695952	3.02771	0.00259078	0.874628	0.23691
cg15942481	0.263824	3.02743	0.00259313	0.874628	0.121476
cg12181078	0.0976715	3.02674	0.00259896	0.874628	0.306771
cg11448557	-0.106204	-3.02644	0.00260175	0.874628	0.137518
cg22698028	-0.097587	-3.02644	0.00260198	0.874628	0.103545
cg17651972	0.0605665	3.02495	0.00261412	0.874628	0.221954
cg04706148	-0.560797	-3.02489	0.00261463	0.874628	0.267425
cg13604537	0.103968	3.0245	0.00261813	0.874628	0.177314
cg14296049	0.054424	3.02432	0.00261941	0.874628	0.19686
cg23025750	0.140901	3.02413	0.00262161	0.874628	0.119971
cg26742320	0.0822795	3.02386	0.0026233	0.874628	0.342896
cg21371454	-0.17308	-3.02359	0.00262563	0.874628	0.115934
cg01430167	-0.643498	-3.02347	0.00262695	0.874628	0.227618
cg07233453	-0.104383	-3.02324	0.00262888	0.874628	0.33569
cg11085294	-0.116256	-3.0227	0.00263323	0.874628	0.100754
cg05577994	0.209233	3.02342	0.00263446	0.874628	0.550909
cg05799088	-1.00137	-3.0224	0.00263582	0.874628	0.988588
cg03317517	0.113163	3.02238	0.00263593	0.874628	0.100962
cg03125754	0.0530588	3.02159	0.00264275	0.874628	0.197526
cg26786037	-0.133916	-3.0213	0.00264526	0.874628	0.129271
cg21619781	0.0652204	3.02069	0.00265075	0.874628	0.144089
cg12660466	0.473667	3.02041	0.00265291	0.874628	0.108858
cg06577703	0.0879433	3.02032	0.00265361	0.874628	0.100265
cg17802213	0.0687342	3.01989	0.00265731	0.874628	0.214451
cg02303016	-0.0769175	-3.01961	0.0026598	0.874628	0.110722
cg05690935	0.142996	3.01953	0.00266048	0.874628	0.306123
cg05431626	0.127718	3.01913	0.00266394	0.874628	0.219379
cg13590979	-0.0835774	-3.01889	0.00266599	0.874628	0.209003
cg21242613	0.0745905	3.01874	0.00266749	0.874628	0.137928
cg12264723	0.0976027	3.01837	0.00267049	0.874628	0.253383
cg00657440	0.112815	3.01815	0.00267237	0.874628	0.148484
cg14243843	0.0458298	3.01811	0.00267295	0.874628	0.200205
cg27188358	-0.0784244	-3.01746	0.00267838	0.874628	0.14549
cg26373021	0.0633296	3.01745	0.00267846	0.874628	0.217992
cg15643133	-0.171067	-3.01708	0.0026822	0.874628	0.216739
cg15993258	-0.130985	-3.01686	0.00268409	0.874628	0.179335
cg11170368	0.17379	3.01677	0.00268431	0.874628	0.143516
cg04380955	0.276489	3.01635	0.00268802	0.874628	0.133259
cg14782015	0.0503209	3.01628	0.00268858	0.874628	0.123244
cg19982001	-0.086407	-3.01628	0.00268862	0.874628	0.140791
cg22106284	0.0645406	3.01609	0.00269054	0.874628	0.136612
cg02307266	-0.148074	-3.016	0.00269102	0.874628	0.127526
cg02360300	-0.0413384	-3.01566	0.00269401	0.874628	0.108239
cg07377017	0.455716	3.01579	0.00269582	0.874628	0.288224
cg07515867	-0.154383	-3.01536	0.00269686	0.874628	0.110815
cg16045677	-0.152611	-3.01522	0.00269813	0.874628	0.114538
cg24948711	-0.402384	-3.01518	0.002699	0.874628	0.27076
cg05147321	0.0564932	3.01499	0.00270043	0.874628	0.186129
cg05540822	0.0464147	3.01483	0.00270125	0.874628	0.103288
cg02656897	0.0932357	3.01458	0.0027035	0.874628	0.275288
cg09474862	0.104591	3.01457	0.00270404	0.874628	0.314754
cg06709107	0.156792	3.0145	0.00270413	0.874628	0.117102
cg27406711	0.0606402	3.01435	0.00270596	0.874628	0.141677
cg19466160	0.0866805	3.01425	0.00270632	0.874628	0.302286
cg02691356	0.0861636	3.01416	0.00270715	0.874628	0.228784
cg19371795	0.062713	3.01394	0.00270906	0.874628	0.168408
cg03535985	-0.583961	-3.01485	0.00271123	0.874628	0.245143
cg05783039	-0.125253	-3.01319	0.00271593	0.874628	0.39364
cg03207666	-0.197472	-3.01314	0.00271635	0.874628	0.165042
cg26987106	-0.709973	-3.01299	0.0027174	0.874628	0.130005
cg02174203	0.0549673	3.01229	0.00272359	0.874628	0.170574
cg05719902	0.0973366	3.01185	0.00272774	0.874628	0.299144
cg21978242	0.0556268	3.01176	0.00272823	0.874628	0.250091
cg26943120	0.1115	3.01165	0.00272917	0.874628	0.322602
cg23204752	-0.150875	-3.01156	0.00272998	0.874628	0.181149
cg01035035	0.126155	3.01136	0.00273181	0.874628	0.105928
cg16732364	-0.0680611	-3.01133	0.00273203	0.874628	0.142391
cg05692123	0.0896421	3.00997	0.00274406	0.874628	0.102635
cg08510261	0.115184	3.0098	0.0027461	0.874628	0.1201
cg10425624	0.0854165	3.00972	0.0027463	0.874628	0.101233
cg16391208	0.0931353	3.00967	0.00274701	0.874628	0.27921
cg05867362	-0.148552	-3.00947	0.00274848	0.874628	0.151099
cg19683989	0.131291	3.00911	0.00275173	0.874628	0.214499
cg10794399	-0.146519	-3.00899	0.0027528	0.874628	0.142921
cg00221668	0.0601978	3.00898	0.0027529	0.874628	0.108403
cg00100025	-0.159335	-3.00893	0.00275331	0.874628	0.315421
cg13832669	0.253751	3.00915	0.00275378	0.874628	0.244702
cg02343254	-0.0670578	-3.00881	0.0027544	0.874628	0.202914
cg25743268	0.16607	3.00865	0.0027558	0.874628	0.301737
cg00572266	0.116983	3.00848	0.00275762	0.874628	0.141935
cg20431676	0.129996	3.00843	0.00275779	0.874628	0.110007
cg10578599	-0.585405	-3.00842	0.00275816	0.874628	0.186568
cg05053414	0.140006	3.00744	0.00276665	0.874628	0.236313
cg03716649	0.139191	3.00744	0.00276686	0.874628	0.23873
cg16886861	0.070949	3.00735	0.00276743	0.874628	0.101998
cg25313698	0.110487	3.00725	0.0027686	0.874628	0.154423
cg11008216	0.161978	3.00707	0.00276988	0.874628	0.118852
cg22449896	-0.138436	-3.00701	0.00277045	0.874628	0.421907
cg23191724	0.0874985	3.00645	0.00277548	0.875277	0.103457
cg02866639	0.1257	3.00597	0.00277979	0.875277	0.343501
cg03564584	-0.181655	-3.00585	0.00278082	0.875277	0.167546
cg10561735	0.0632192	3.00506	0.00278794	0.875277	0.123969
cg09110560	0.128101	3.00504	0.0027881	0.875277	0.146179
cg16928170	-0.073181	-3.00496	0.00278916	0.875277	0.101165
cg04198946	0.0570916	3.00475	0.00279073	0.875277	0.174809
cg14146249	0.159762	3.00473	0.00279095	0.875277	0.261385
cg04355444	-0.0935113	-3.00481	0.00279239	0.875277	0.208424
cg15553631	-0.490424	-3.00399	0.00280008	0.875277	0.101568
cg12074968	-0.069554	-3.00345	0.00280249	0.875277	0.144048
cg20011360	0.202452	3.00305	0.0028061	0.875277	0.561101
cg20139094	-0.110545	-3.00308	0.00280611	0.875277	0.281833
cg23888321	-0.402541	-3.00298	0.00280732	0.875277	0.280292
cg27018019	0.103109	3.00271	0.00280944	0.875277	0.251159
cg02712587	-0.345877	-3.00247	0.00281139	0.875277	0.122235
cg11829237	0.0856517	3.00243	0.0028117	0.875277	0.121518
cg04494906	-0.0898495	-3.0023	0.00281347	0.875277	0.109483
cg09073493	0.10006	3.0022	0.00281382	0.875277	0.128151
cg02154558	0.0646417	3.00183	0.0028172	0.875651	0.186608
cg00338231	0.0968756	3.00128	0.00282245	0.875879	0.260625
cg20451455	-0.0825857	-3.00113	0.00282352	0.875879	0.160098
cg06976994	-0.166996	-3.00103	0.0028245	0.875879	0.116691
cg10833215	0.0569739	3.00001	0.00283375	0.875879	0.153467
cg19443707	0.181214	2.99997	0.00283441	0.875879	0.42126
cg27536168	0.0565555	2.99948	0.00283884	0.875879	0.179737
cg13273076	-0.221187	-2.99931	0.00284154	0.875879	0.262897
cg05624226	-0.111927	-2.99888	0.00284441	0.875879	0.10161
cg10337367	-0.20176	-2.99881	0.00284531	0.875879	0.126749
cg03539071	-0.17012	-2.99861	0.00284658	0.875879	0.101631
cg19511857	0.101191	2.99855	0.00284715	0.875879	0.165902
cg13187778	-0.120301	-2.99831	0.00284959	0.875879	0.399944
cg12373920	0.106173	2.99815	0.0028508	0.875879	0.148631
cg02438611	0.0599736	2.99801	0.00285214	0.875879	0.198407
cg16813697	0.0698753	2.99794	0.00285273	0.875879	0.154495
cg21221226	-0.132945	-2.99742	0.00285754	0.875879	0.106139
cg08235266	-0.0958912	-2.99725	0.00285912	0.875879	0.178701
cg02441090	0.0638617	2.99665	0.00286486	0.875879	0.167341
cg15032112	-0.460367	-2.99632	0.00286769	0.875879	0.13038
cg00606396	-0.302864	-2.99601	0.00287055	0.875879	0.116939
cg13982956	0.118328	2.99587	0.00287211	0.875879	0.360517
cg11750080	-0.305195	-2.99568	0.0028744	0.875879	0.177153
cg15989101	0.383003	2.99538	0.00287668	0.875879	0.283035
cg14324600	0.14858	2.99526	0.00287775	0.875879	0.144872
cg20131581	-0.0879456	-2.99526	0.00287804	0.875879	0.121446
cg26196162	0.177533	2.99521	0.00287818	0.875879	0.238422
cg08800414	-0.066924	-2.99509	0.00287909	0.875879	0.106266
cg01120173	0.164495	2.99505	0.00287943	0.875879	0.317968
cg19859698	0.0737975	2.99485	0.00288128	0.875879	0.109766
cg04156077	1.07342	2.99467	0.00288321	0.875879	0.990492
cg05958749	0.133573	2.99425	0.00288682	0.876193	0.174404
cg11127112	0.116759	2.99409	0.0028886	0.876193	0.31477
cg02466749	0.0818339	2.99371	0.00289184	0.876516	0.145647
cg20392456	0.0787801	2.99317	0.00289715	0.877465	0.189672
cg09634950	0.138733	2.9925	0.00290375	0.878214	0.293988
cg14857394	0.0783657	2.99205	0.00290732	0.878214	0.122469
cg01345136	0.135509	2.99202	0.00290762	0.878214	0.316419
cg21697661	0.0762645	2.99197	0.00290835	0.878214	0.194154
cg26055840	0.0591663	2.99161	0.00291149	0.87835	0.110868
cg04090412	0.203053	2.99136	0.00291383	0.87835	0.428551
cg07757887	0.0831511	2.99052	0.00292199	0.87835	0.204118
cg24169315	0.0998664	2.99039	0.00292291	0.87835	0.278851
cg27207764	-0.244796	-2.99017	0.00292695	0.87835	0.262141
cg16890496	-0.0581582	-2.98988	0.00292804	0.87835	0.129716
cg04774965	0.0444499	2.98989	0.00292822	0.87835	0.114127
cg25856827	0.0687757	2.98939	0.00293237	0.87835	0.160117
cg00313071	0.139881	2.98933	0.00293347	0.87835	0.173914
cg24632014	0.321149	2.98882	0.00293772	0.87835	0.107097
cg10096321	0.0839819	2.98859	0.00293993	0.87835	0.10758
cg04827692	0.0688381	2.98864	0.00293998	0.87835	0.145387
cg03929179	-0.137006	-2.98857	0.00294005	0.87835	0.152682
cg14622604	-0.127692	-2.9885	0.00294073	0.87835	0.141781
cg08141172	0.0864347	2.98829	0.00294298	0.87835	0.250328
cg10624665	0.0745696	2.98819	0.00294372	0.87835	0.160342
cg09509179	0.0857638	2.98772	0.00294809	0.878508	0.210634
cg08200507	-0.131734	-2.98734	0.00295288	0.878508	0.122387
cg22997193	0.342158	2.98714	0.0029539	0.878508	0.141623
cg11847185	-0.393765	-2.987	0.00295495	0.878508	0.123356
cg07847171	-0.235507	-2.98701	0.00295516	0.878508	0.214998
cg15020206	0.148434	2.98593	0.00296509	0.879334	0.367984
cg06649280	0.0754669	2.98589	0.00296546	0.879334	0.216641
cg04086226	-0.238243	-2.98542	0.00297029	0.879334	0.140519
cg11174569	0.0699287	2.98541	0.00297036	0.879334	0.111513
cg22817650	-0.57465	-2.98559	0.00297087	0.879334	0.177495
cg07591515	0.0932737	2.9851	0.00297308	0.879334	0.205053
cg02161080	0.248783	2.98504	0.00297357	0.879334	0.112708
cg13818616	0.217503	2.98485	0.00297542	0.879334	0.425364
cg06614969	0.40424	2.9845	0.00298018	0.880097	0.606749
cg27285103	0.0505587	2.98365	0.00298689	0.8807	0.16145
cg08965435	-0.122558	-2.98329	0.00299033	0.8807	0.186562
cg07507559	-0.1134	-2.98327	0.00299169	0.8807	0.11549
cg01882774	-0.604095	-2.98304	0.00299278	0.8807	0.941528
cg22017754	-0.184769	-2.98276	0.00299545	0.8807	0.268768
cg04559481	-0.197118	-2.98269	0.00299608	0.8807	0.123749
cg03122735	0.193626	2.98257	0.00299754	0.8807	0.107273
cg17941015	0.049122	2.98215	0.00300131	0.881131	0.107276
cg00304423	-0.0875349	-2.98155	0.00300714	0.881131	0.107663
cg17209914	0.0821427	2.98119	0.0030106	0.881131	0.100532
cg23248910	0.145885	2.98002	0.0030219	0.881131	0.338323
cg11310425	0.0997368	2.98004	0.00302196	0.881131	0.305111
cg03236936	0.107925	2.97985	0.00302354	0.881131	0.134315
cg08705587	0.268988	2.98022	0.00302927	0.881131	0.575646
cg18145937	-0.0832944	-2.97903	0.00303152	0.881131	0.122293
cg24553170	0.147854	2.9787	0.00303469	0.881131	0.363082
cg03606258	-0.399852	-2.97849	0.00303705	0.881131	0.898836
cg05727199	0.13146	2.97828	0.00303908	0.881131	0.304251
cg18008976	0.0723274	2.97799	0.00304225	0.881131	0.122624
cg15083207	0.0897633	2.97794	0.00304237	0.881131	0.12883
cg14398339	0.0600114	2.97783	0.00304346	0.881131	0.122382
cg01140616	-0.0617991	-2.97774	0.00304404	0.881131	0.174087
cg20791712	0.0483987	2.9772	0.00304936	0.881131	0.182125
cg05288426	0.0682737	2.97516	0.00306936	0.881131	0.189943
cg05918002	0.10289	2.97498	0.00307135	0.881131	0.277821
cg09277823	0.0685923	2.97492	0.00307171	0.881131	0.22124
cg01066416	0.0713255	2.97473	0.00307353	0.881131	0.219213
cg19995539	0.11638	2.97423	0.00307854	0.881131	0.22581
cg12636607	0.239544	2.97405	0.00308052	0.881131	0.294669
cg16784215	0.088358	2.97378	0.00308289	0.881131	0.158253
cg07440055	0.0981814	2.97365	0.00308425	0.881131	0.311152
cg11643041	0.0770518	2.9733	0.00308769	0.881131	0.159575
cg08431709	-0.115141	-2.97253	0.00309531	0.881131	0.117037
cg06971773	-0.0961584	-2.97244	0.00309616	0.881131	0.29531
cg18710784	0.10294	2.97231	0.00309746	0.881131	0.118607
cg11026382	-0.528252	-2.97197	0.00310199	0.881131	0.165764
cg26383537	0.186558	2.97174	0.00310315	0.881131	0.187087
cg03484834	-0.0613771	-2.97135	0.00310702	0.881131	0.145335
cg12427017	0.34949	2.97033	0.00311721	0.881131	0.197747
cg14058329	-0.172374	-2.97033	0.00311773	0.881131	0.223772
cg27645968	0.0681727	2.96987	0.00312174	0.881131	0.19561
cg15469732	-0.0672577	-2.96981	0.00312266	0.881131	0.229062
cg17039906	0.10183	2.96975	0.00312294	0.881131	0.190042
cg25169706	-0.0804641	-2.96973	0.00312348	0.881131	0.104089
cg00527489	0.105624	2.96959	0.00312457	0.881131	0.166064
cg03108966	0.647519	2.96942	0.00312627	0.881131	0.232756
cg24529771	0.0737322	2.96933	0.0031271	0.881131	0.249555
cg26169421	0.071024	2.96917	0.00312878	0.881131	0.117922
cg14542554	0.121911	2.96915	0.00312897	0.881131	0.124798
cg17034079	-0.128275	-2.96909	0.00312985	0.881131	0.195294
cg17440869	0.131126	2.96887	0.00313208	0.881131	0.30484
cg26907472	0.0847658	2.96867	0.00313375	0.881131	0.259665
cg07870879	0.067729	2.96882	0.00313578	0.881131	0.19503
cg05024939	0.0616329	2.96821	0.00313832	0.881131	0.113896
cg20394896	0.141231	2.9679	0.00314146	0.881131	0.134133
cg05921905	0.13175	2.96836	0.00314352	0.881131	0.176181
cg16751665	-0.104464	-2.96759	0.00314543	0.881131	0.139999
cg10932939	0.124461	2.96739	0.00314662	0.881131	0.262932
cg01922472	0.106419	2.96685	0.00315203	0.881131	0.128952
cg05794931	-0.114964	-2.96678	0.00315278	0.881131	0.346737
cg10540164	0.0440389	2.96606	0.00316001	0.881131	0.123558
cg11866742	0.0993484	2.96587	0.00316191	0.881131	0.173441
cg17444409	-0.164165	-2.9657	0.00316359	0.881131	0.139309
cg09917056	0.126518	2.96568	0.00316381	0.881131	0.134032
cg07098168	0.129514	2.96542	0.00316649	0.881131	0.208368
cg23832029	0.156859	2.96549	0.0031666	0.881131	0.166117
cg16639540	0.0729481	2.96485	0.0031722	0.881131	0.177644
cg06355652	0.146797	2.96456	0.00317517	0.881131	0.229382
cg26154904	-0.319346	-2.96454	0.00317562	0.881131	0.227593
cg06027587	0.293558	2.9636	0.00318488	0.881131	0.114444
cg06155771	0.129632	2.96335	0.00318834	0.881131	0.178744
cg25254350	-0.510885	-2.96294	0.00319163	0.881131	0.898025
cg08565583	-0.106847	-2.96175	0.00320377	0.881131	0.246782
cg19528338	0.0802567	2.96166	0.00320468	0.881131	0.227699
cg20590252	0.142154	2.96167	0.00320489	0.881131	0.347166
cg05661004	0.0811723	2.96163	0.00320503	0.881131	0.150608
cg21627466	0.124214	2.96153	0.0032063	0.881131	0.119894
cg14507310	0.1203	2.96137	0.00320769	0.881131	0.255573
cg08087737	0.126848	2.96103	0.0032112	0.881131	0.145256
cg20848988	0.0748549	2.9611	0.00321219	0.881131	0.180544
cg08051321	-0.096641	-2.96089	0.00321256	0.881131	0.11689
cg22506343	0.0440658	2.96074	0.00321469	0.881131	0.135646
cg08497039	0.0756968	2.96057	0.00321703	0.881131	0.250106
cg23641514	-0.163859	-2.96042	0.00321768	0.881131	0.167954
cg19954011	0.0963349	2.96019	0.0032198	0.881131	0.202392
cg05450351	0.568865	2.96109	0.00322019	0.881131	0.451012
cg03214008	0.367471	2.96016	0.00322066	0.881131	0.101335
cg09607525	0.0610928	2.95995	0.00322229	0.881131	0.101641
cg16672337	0.181626	2.95953	0.00322655	0.881131	0.109194
cg11011600	-0.456234	-2.95912	0.0032308	0.881131	0.856412
cg09041015	0.0707479	2.9591	0.00323125	0.881131	0.200635
cg03366627	0.373336	2.9588	0.00323405	0.881131	0.242252
cg21302743	0.126419	2.95807	0.00324219	0.881131	0.104617
cg15798997	-0.0705806	-2.95797	0.00324262	0.881131	0.169807
cg20841603	0.629117	2.95766	0.00324679	0.881131	0.306313
cg04804543	0.161773	2.95757	0.00324679	0.881131	0.217272
cg13104220	0.0687068	2.95756	0.00324689	0.881131	0.172797
cg19529229	0.0712091	2.95745	0.00324917	0.881131	0.101578
cg17373657	-0.162442	-2.95704	0.00325257	0.881131	0.150519
cg11136049	0.172539	2.95663	0.00325651	0.881131	0.448535
cg17302906	0.0761764	2.95655	0.00325735	0.881131	0.207989
cg07382566	-0.470189	-2.95578	0.00326539	0.881131	0.149533
cg11415067	0.129131	2.95578	0.00326568	0.881131	0.257534
cg07466232	0.0659303	2.9554	0.00326934	0.881131	0.187087
cg03028721	0.0938871	2.95514	0.00327206	0.881131	0.274464
cg09797356	0.0484656	2.95461	0.00327789	0.881131	0.184109
cg26970032	0.190294	2.95438	0.00327999	0.881131	0.135435
cg00188327	0.0871996	2.95423	0.00328185	0.881131	0.323328
cg11712958	-0.137289	-2.95381	0.00328589	0.881131	0.103811
cg04830983	0.0676693	2.95368	0.00328934	0.881131	0.129821
cg00145863	-0.164601	-2.95349	0.00328957	0.881131	0.15502
cg20742009	0.14745	2.95337	0.00329047	0.881131	0.140332
cg13167470	-0.119878	-2.95337	0.00329115	0.881131	0.126524
cg17681491	0.18163	2.9529	0.00329542	0.881131	0.194415
cg07338204	-0.200856	-2.95288	0.00329591	0.881131	0.107727
cg14976569	-0.0535324	-2.95287	0.00329605	0.881131	0.15739
cg04099632	0.0961821	2.95303	0.00329809	0.881131	0.108078
cg16413675	0.0505358	2.95236	0.00330109	0.881131	0.154323
cg00330375	0.0913925	2.95218	0.00330302	0.881131	0.225296
cg00475711	0.0671002	2.95217	0.00330314	0.881131	0.132578
cg01283794	0.0829696	2.95213	0.00330385	0.881131	0.211105
cg05214424	-0.117857	-2.95187	0.00330659	0.881131	0.14239
cg06466728	-0.215369	-2.95179	0.00330708	0.881131	0.11517
cg05740505	0.0915905	2.9515	0.00331021	0.881131	0.210638
cg18647745	0.0520002	2.9514	0.00331126	0.881131	0.192862
cg17165477	0.107081	2.95072	0.00331833	0.881131	0.118074
cg17432241	-0.0539495	-2.95048	0.00332091	0.881131	0.198616
cg00236783	0.0847216	2.95036	0.00332251	0.881131	0.191558
cg08719347	0.0472748	2.95006	0.00332597	0.881131	0.172075
cg10151473	0.240853	2.95007	0.00332709	0.881131	0.115633
cg02910037	0.0991396	2.94989	0.00332713	0.881131	0.102501
cg11805552	0.147744	2.94939	0.00333248	0.881131	0.143498
cg21954381	-0.658916	-2.94938	0.00333285	0.881131	0.46305
cg19719313	0.1111	2.94931	0.00333334	0.881131	0.171076
cg07839933	0.184126	2.94928	0.00333362	0.881131	0.171269
cg01282725	0.0982829	2.9491	0.00333588	0.881131	0.139274
cg19213675	-0.0600701	-2.94866	0.0033402	0.881131	0.102095
cg01741836	0.107414	2.94864	0.00334045	0.881131	0.293603
cg08754268	-0.269667	-2.94863	0.00334082	0.881131	0.266777
cg13608005	-0.124635	-2.94855	0.0033414	0.881131	0.188006
cg22455147	-0.0916663	-2.94841	0.0033432	0.881131	0.141374
cg03396323	0.398743	2.94823	0.00334475	0.881131	0.112772
cg01194310	0.0633951	2.94813	0.00334578	0.881131	0.260184
cg18690735	0.442317	2.94802	0.00334698	0.881131	0.17087
cg16170924	0.0895896	2.94778	0.00334957	0.881131	0.135365
cg15047616	0.0608647	2.94775	0.00335105	0.881131	0.210409
cg23697997	0.132878	2.94764	0.00335164	0.881131	0.175124
cg07962303	0.104987	2.94757	0.00335178	0.881131	0.158607
cg14245185	0.0691236	2.94754	0.00335207	0.881131	0.163541
cg24235882	0.0625145	2.94688	0.0033592	0.881131	0.283872
cg07529392	0.0698591	2.94671	0.00336099	0.881131	0.225572
cg09918674	0.0794205	2.94658	0.0033623	0.881131	0.11571
cg01467435	0.118274	2.94656	0.00336315	0.881131	0.249221
cg20634266	0.0552268	2.94588	0.00336981	0.881131	0.127225
cg09079582	-0.155773	-2.94562	0.00337325	0.881131	0.121693
cg12880244	0.0583367	2.9452	0.0033771	0.881131	0.196786
cg18661237	-0.118287	-2.9448	0.00338238	0.881131	0.215538
cg07483086	0.204297	2.9445	0.00338465	0.881131	0.225811
cg24461952	0.116456	2.94426	0.00338721	0.881131	0.100211
cg01379428	0.0939859	2.94405	0.00339068	0.881131	0.16613
cg00803456	0.0955788	2.94356	0.00339599	0.881131	0.369927
cg08421782	0.0508971	2.94298	0.00340128	0.881131	0.200414
cg07250596	0.131175	2.94286	0.00340233	0.881131	0.110386
cg02032558	0.0954834	2.94285	0.00340241	0.881131	0.194596
cg16233935	0.0875346	2.94282	0.00340274	0.881131	0.135897
cg14319127	0.068327	2.94279	0.00340312	0.881131	0.1306
cg11984463	0.0614385	2.94256	0.0034056	0.881131	0.21981
cg00915395	0.086306	2.94253	0.0034059	0.881131	0.133926
cg14979477	0.060228	2.94251	0.00340609	0.881131	0.187876
cg07161625	0.0758626	2.94249	0.00340627	0.881131	0.11492
cg05423827	0.0722386	2.94243	0.00340698	0.881131	0.114267
cg22358235	0.148454	2.94234	0.00340826	0.881131	0.271636
cg05284201	0.0926969	2.94221	0.00340936	0.881131	0.21027
cg06785162	-0.143274	-2.94216	0.00340994	0.881131	0.208573
cg12097191	-0.0671914	-2.94195	0.00341221	0.881131	0.141167
cg12386876	-0.412381	-2.94213	0.00341235	0.881131	0.136915
cg00040825	0.0672824	2.94183	0.00341411	0.881131	0.300855
cg12102690	0.176945	2.94129	0.00341964	0.881131	0.200773
cg22939408	-0.147828	-2.9411	0.0034214	0.881131	0.106468
cg10011523	0.103915	2.94036	0.00342939	0.881131	0.167424
cg09495909	-0.111526	-2.94013	0.00343224	0.881131	0.174508
cg22244122	0.061534	2.94007	0.00343289	0.881131	0.17068
cg23657393	0.0840721	2.93984	0.00343512	0.881131	0.128874
cg06724305	0.072726	2.93957	0.00343804	0.881131	0.11914
cg04481096	0.105412	2.93905	0.00344368	0.881131	0.203979
cg27187215	0.137916	2.93857	0.00344889	0.881131	0.109884
cg07743702	0.0878708	2.93853	0.00344934	0.881131	0.254974
cg22159058	0.0741707	2.93853	0.00344936	0.881131	0.194287
cg13414020	0.0965606	2.93833	0.00345161	0.881131	0.286534
cg20576499	0.0653709	2.93829	0.00345235	0.881131	0.193116
cg26627321	-0.40171	-2.93802	0.00345498	0.881131	0.139907
cg12378939	-0.168281	-2.93792	0.00345603	0.881131	0.152965
cg00179906	0.0610514	2.93791	0.00345618	0.881131	0.163778
cg08777079	-0.574555	-2.93798	0.00345631	0.881131	0.15137
cg06737494	0.0958536	2.93784	0.00345689	0.881131	0.14617
cg11636127	0.0779487	2.93766	0.00345925	0.881131	0.1556
cg12654856	-0.146412	-2.93752	0.00346049	0.881131	0.138953
cg03066986	0.111102	2.93751	0.00346052	0.881131	0.131349
cg14350079	0.0523224	2.93743	0.00346141	0.881131	0.174205
cg07861790	-0.074671	-2.93712	0.0034655	0.881131	0.211871
cg01997105	-0.153587	-2.93705	0.00346556	0.881131	0.13352
cg03207054	0.0709324	2.93691	0.00346717	0.881131	0.151306
cg02997409	-0.0777736	-2.93655	0.00347177	0.881131	0.116256
cg12945336	0.0471185	2.93624	0.00347453	0.881131	0.10604
cg11945507	0.108975	2.93614	0.00347682	0.881131	0.171575
cg13228442	0.0546506	2.93605	0.00347692	0.881131	0.111153
cg08677535	0.0738821	2.93582	0.00347911	0.881131	0.197611
cg13313697	0.118703	2.93573	0.00348045	0.881131	0.155593
cg01645874	-0.136406	-2.93559	0.00348169	0.881131	0.197495
cg01664382	0.0487604	2.93557	0.00348185	0.881131	0.128949
cg01304700	0.0761259	2.93556	0.00348205	0.881131	0.193911
cg19919789	0.0513039	2.93546	0.00348342	0.881131	0.184741
cg16586261	-0.112507	-2.93537	0.00348413	0.881131	0.102972
cg15425280	0.0740254	2.93516	0.00348676	0.881131	0.104072
cg07100242	-0.139723	-2.93494	0.00348889	0.881131	0.18497
cg03680950	0.0610312	2.93486	0.00349003	0.881131	0.144257
cg24767368	-0.360709	-2.93466	0.00349193	0.881131	0.105645
cg04149141	0.0603108	2.93418	0.00349754	0.881131	0.252987
cg03559173	0.573785	2.93405	0.00350026	0.881131	0.103006
cg11918129	-0.102518	-2.93383	0.00350181	0.881131	0.11036
cg05184394	0.0985409	2.93354	0.00350434	0.881131	0.300832
cg00396730	0.140345	2.93292	0.00351122	0.881131	0.240031
cg27087885	0.223101	2.93264	0.0035144	0.881131	0.241862
cg00566208	0.119348	2.9325	0.00351587	0.881131	0.195671
cg18919478	0.0991408	2.93227	0.00351883	0.881131	0.1402
cg05110943	0.0734003	2.93205	0.00352087	0.881131	0.205809
cg09665571	0.0642917	2.93189	0.00352297	0.881131	0.154069
cg17122629	0.0523816	2.9317	0.00352763	0.881131	0.167022
cg17073300	-0.105186	-2.93145	0.00352766	0.881131	0.114803
cg01871722	0.136362	2.93148	0.00352914	0.881131	0.296773
cg13265276	-0.173256	-2.93109	0.00353158	0.881131	0.272986
cg08713858	0.0700001	2.93079	0.00353535	0.881131	0.156833
cg26946042	0.12549	2.9305	0.00353857	0.881131	0.275813
cg11107579	0.0924414	2.93022	0.00354168	0.881131	0.183575
cg06244730	0.23279	2.93019	0.0035417	0.881131	0.191245
cg09556489	0.0957855	2.93005	0.00354322	0.881131	0.210402
cg17365440	-0.118212	-2.9298	0.0035464	0.881131	0.138126
cg11970695	0.0692192	2.92974	0.00354676	0.881131	0.216265
cg11251367	-1.07312	-2.92963	0.00354803	0.881131	0.961849
cg15698196	0.0748809	2.92956	0.00354878	0.881131	0.165487
cg13208018	-0.0978014	-2.92927	0.0035533	0.881131	0.273279
cg15164641	0.106369	2.92895	0.00355561	0.881131	0.10433
cg04004375	-0.119034	-2.92853	0.00356038	0.881131	0.171728
cg14688579	0.0890923	2.92842	0.0035628	0.881131	0.103958
cg09666372	0.0508117	2.92831	0.00356285	0.881131	0.241109
cg27134832	-0.100684	-2.92819	0.00356453	0.881131	0.247506
cg22242770	0.187202	2.92788	0.00356767	0.881131	0.145545
cg04043098	0.108369	2.92757	0.00357153	0.881131	0.230088
cg00679556	-0.125992	-2.92736	0.00357351	0.881131	0.109837
cg07841070	0.127672	2.92762	0.00357379	0.881131	0.242503
cg12776129	-0.182792	-2.92734	0.0035738	0.881131	0.11431
cg12721730	0.0797941	2.92721	0.00357528	0.881131	0.119945
cg06559326	-0.138278	-2.92714	0.00357635	0.881131	0.183094
cg18865949	0.177136	2.92709	0.00357692	0.881131	0.1333
cg20557159	0.120256	2.92655	0.0035827	0.881131	0.164222
cg09017815	0.109442	2.92609	0.00358827	0.881131	0.273078
cg16699281	0.0716809	2.92597	0.00358927	0.881131	0.109051
cg12849734	0.13961	2.92594	0.00358964	0.881131	0.335895
cg14513778	0.0839942	2.92558	0.00359374	0.881131	0.19258
cg15287044	0.198191	2.92547	0.0035949	0.881131	0.306796
cg00381361	-0.125212	-2.92501	0.00360079	0.881131	0.241718
cg23895884	0.067435	2.92483	0.00360228	0.881131	0.115735
cg21969477	0.0851076	2.92482	0.00360229	0.881131	0.10148
cg10230242	0.0864061	2.92471	0.0036036	0.881131	0.144602
cg03146733	-0.0991684	-2.92456	0.00360531	0.881131	0.174218
cg09761247	0.120597	2.92363	0.0036159	0.881131	0.208112
cg00601836	-0.191602	-2.92386	0.00361617	0.881131	0.30197
cg03290016	-0.135653	-2.92327	0.00362006	0.881131	0.106553
cg12840245	-0.205394	-2.92315	0.00362171	0.881131	0.204115
cg22633036	0.290683	2.9231	0.00362191	0.881131	0.485757
cg16102283	-0.0889933	-2.92233	0.00363082	0.881131	0.118875
cg05010551	-0.540482	-2.92223	0.00363261	0.881131	0.285618
cg06066088	0.0752413	2.92183	0.00363655	0.881131	0.226179
cg24717293	0.0911791	2.92174	0.00363756	0.881131	0.151857
cg02971209	0.0967178	2.92171	0.00363788	0.881131	0.203397
cg05835416	0.0522765	2.92167	0.00363837	0.881131	0.177478
cg07704205	0.0557006	2.92114	0.00364442	0.881131	0.132927
cg00585187	-0.215184	-2.92119	0.00364511	0.881131	0.159051
cg24024253	-0.110822	-2.92034	0.00365425	0.881131	0.276777
cg15215799	-0.125773	-2.92026	0.00365517	0.881131	0.106604
cg16814362	0.12744	2.9202	0.0036553	0.881131	0.418396
cg01449310	0.0765123	2.92007	0.00365672	0.881131	0.187362
cg02571436	0.0908186	2.91995	0.0036582	0.881131	0.256601
cg11576176	0.169404	2.91986	0.00365919	0.881131	0.153722
cg02640190	0.124567	2.91982	0.00365964	0.881131	0.16185
cg16403016	0.104639	2.91943	0.00366441	0.881131	0.211699
cg16410413	0.0412745	2.91926	0.00366608	0.881131	0.120254
cg20923885	0.0476911	2.91904	0.00366867	0.881131	0.156889
cg07564659	0.0985297	2.91902	0.00366884	0.881131	0.21999
cg23390684	-0.232735	-2.91869	0.00367276	0.881131	0.585124
cg07545828	0.0886569	2.91863	0.00367345	0.881131	0.10677
cg15184934	0.130089	2.91845	0.00367545	0.881131	0.110926
cg06527535	0.113975	2.9182	0.00367838	0.881131	0.161398
cg21296230	0.0686584	2.91805	0.00368017	0.881131	0.106895
cg05786231	0.114705	2.91763	0.00368503	0.881131	0.334935
cg17858625	0.0786021	2.91761	0.00368555	0.881131	0.13548
cg18709562	0.0696852	2.91747	0.00368689	0.881131	0.214838
cg09981662	0.0785876	2.91761	0.00368817	0.881131	0.162614
cg24938968	-0.133716	-2.91728	0.00368902	0.881131	0.145363
cg02929052	0.0560943	2.91726	0.00368928	0.881131	0.165229
cg14245199	0.0732266	2.91713	0.00369079	0.881131	0.26654
cg19930290	0.460015	2.91676	0.00369711	0.881131	0.146098
cg15854035	0.176837	2.91611	0.00370272	0.881131	0.103996
cg00626856	0.0844325	2.91565	0.00370801	0.881131	0.108923
cg15371815	0.118211	2.91547	0.00371081	0.881131	0.305032
cg22463117	-0.560084	-2.91478	0.00371857	0.881131	0.133221
cg25196158	0.105714	2.91458	0.00372056	0.881131	0.141641
cg07741172	-0.0640718	-2.91459	0.00372075	0.881131	0.105491
cg27159967	0.0643093	2.91455	0.00372094	0.881131	0.147898
cg18058448	-0.108857	-2.91361	0.003732	0.881131	0.102265
cg18685394	0.0484205	2.9135	0.0037333	0.881131	0.161161
cg12686441	0.180262	2.91351	0.00373348	0.881131	0.203634
cg25556051	0.0534721	2.91331	0.00373552	0.881131	0.121503
cg16723673	0.090182	2.91319	0.0037369	0.881131	0.170688
cg08575249	0.0842906	2.91313	0.00373756	0.881131	0.120197
cg24251283	0.0739279	2.91297	0.00373955	0.881131	0.229411
cg11689323	0.0919116	2.91275	0.0037421	0.881131	0.107918
cg22616050	0.0801444	2.91288	0.00374248	0.881131	0.104363
cg09547226	0.112474	2.91245	0.00374563	0.881131	0.20833
cg15418246	0.0738779	2.91236	0.00374674	0.881131	0.121781
cg11275805	0.110033	2.91226	0.00374786	0.881131	0.157046
cg06181930	0.112674	2.91163	0.00375536	0.881131	0.102625
cg23999318	0.0652786	2.91158	0.00375619	0.881131	0.198764
cg23512567	0.0927866	2.91153	0.00375652	0.881131	0.415012
cg04820491	0.0546902	2.9114	0.00375801	0.881131	0.189758
cg00115458	-0.0840897	-2.91124	0.00376052	0.881131	0.247908
cg27118485	0.079323	2.91115	0.00376099	0.881131	0.195468
cg02856510	-0.134643	-2.91037	0.00377054	0.881131	0.169807
cg07093324	-0.136545	-2.91033	0.00377065	0.881131	0.197513
cg26224060	0.0688371	2.91032	0.00377083	0.881131	0.129482
cg16611967	0.672943	2.91012	0.00377317	0.881131	0.546458
cg16007227	0.237032	2.90993	0.00377575	0.881131	0.164706
cg18132279	-0.168439	-2.90979	0.00377811	0.881131	0.303416
cg26581669	0.0950881	2.90967	0.00377856	0.881131	0.260884
cg06269806	-0.0944186	-2.90949	0.0037807	0.881131	0.152187
cg26856631	-1.0819	-2.90947	0.00378191	0.881131	0.971133
cg04815890	-0.0736832	-2.90939	0.00378219	0.881131	0.221988
cg27420005	0.077318	2.90922	0.00378389	0.881131	0.104255
cg14122980	0.138513	2.90917	0.00378452	0.881131	0.358185
cg11758280	0.0953995	2.90908	0.00378594	0.881131	0.258736
cg22895961	0.0593708	2.90868	0.00379065	0.881131	0.249607
cg06081153	0.544021	2.90945	0.0037907	0.881131	0.121988
cg22443057	0.110122	2.90846	0.00379295	0.881131	0.24041
cg17112975	0.0421986	2.90805	0.00379812	0.881131	0.131025
cg00055811	0.359711	2.90804	0.00379831	0.881131	0.161679
cg01448470	0.0699992	2.90786	0.00380015	0.881131	0.237099
cg25164589	0.097576	2.90783	0.00380046	0.881131	0.270667
cg13640471	0.185141	2.90733	0.00380705	0.881131	0.157533
cg23973046	0.53693	2.90727	0.00380711	0.881131	0.205857
cg26074618	0.121375	2.90722	0.00380772	0.881131	0.120889
cg09951273	-0.150669	-2.90718	0.00380819	0.881131	0.193086
cg00248813	0.0524784	2.90696	0.00381089	0.881131	0.145937
cg17858811	0.437951	2.9068	0.00381479	0.881131	0.136434
cg10769180	0.137525	2.90657	0.00381551	0.881131	0.14323
cg19342791	0.422217	2.90659	0.00381599	0.881131	0.113638
cg26578682	0.0603182	2.90622	0.00381973	0.881131	0.146417
cg01860545	0.203573	2.90622	0.00382004	0.881131	0.289262
cg14918582	0.083355	2.90607	0.00382159	0.881131	0.203575
cg16274711	0.17631	2.90587	0.00382432	0.881131	0.512993
cg13770114	0.166847	2.9056	0.00382725	0.881131	0.281
cg02223561	0.061468	2.90521	0.0038319	0.881131	0.205942
cg02487987	-0.115317	-2.90512	0.00383302	0.881131	0.168642
cg16228380	0.152499	2.90481	0.00383669	0.881131	0.118753
cg20001658	0.0848231	2.90437	0.00384231	0.881131	0.229625
cg03722901	0.0601054	2.90426	0.00384334	0.881131	0.189185
cg06735326	0.0827711	2.9041	0.0038456	0.881131	0.327273
cg05706437	0.231519	2.90389	0.00384783	0.881131	0.178877
cg01163339	0.0814445	2.90386	0.00384816	0.881131	0.139532
cg03725573	0.0553703	2.90342	0.00385377	0.881131	0.126771
cg21008145	-0.075827	-2.90335	0.00385465	0.881131	0.118202
cg20574650	-0.173111	-2.90306	0.00385878	0.881131	0.159313
cg19823280	0.0728078	2.90298	0.00385878	0.881131	0.249798
cg13548313	-0.0614282	-2.90303	0.00385885	0.881131	0.119204
cg01907347	0.097457	2.9029	0.00385982	0.881131	0.268928
cg09945985	0.186886	2.9028	0.00386096	0.881131	0.241291
cg27423216	0.119418	2.9026	0.00386346	0.881131	0.339708
cg11819909	0.0774386	2.90265	0.00386476	0.881131	0.129176
cg15383322	0.11572	2.90197	0.00387112	0.881131	0.101247
cg04891442	0.0661382	2.90177	0.00387349	0.881131	0.123221
cg23521214	0.114623	2.90178	0.00387376	0.881131	0.345865
cg02408519	-0.205104	-2.90169	0.00387445	0.881131	0.210635
cg10817245	-0.10249	-2.90168	0.00387495	0.881131	0.294587
cg06703881	-0.0974357	-2.90114	0.00388122	0.881131	0.161496
cg05598488	0.197547	2.90052	0.00388876	0.881131	0.595551
cg14435587	-0.0659992	-2.90037	0.00389085	0.881131	0.130515
cg12383807	0.0800936	2.90005	0.0038945	0.881131	0.144839
cg16155293	0.0702406	2.90004	0.0038953	0.881131	0.250717
cg04910179	-0.157774	-2.89993	0.0038959	0.881131	0.16281
cg13470964	-0.299694	-2.89954	0.00390064	0.881131	0.198594
cg08691237	-0.399433	-2.89915	0.00390551	0.881131	0.59788
cg19470812	0.0768053	2.89907	0.00390646	0.881131	0.2626
cg12043967	-0.101124	-2.89888	0.00390909	0.881131	0.157119
cg19170807	0.128861	2.8988	0.00390979	0.881131	0.236597
cg19888481	0.100028	2.89879	0.00390988	0.881131	0.304064
cg14440543	-0.0571056	-2.89867	0.00391131	0.881131	0.149379
cg10687217	0.0749785	2.89839	0.00391475	0.881131	0.153572
cg14588682	-0.215094	-2.89835	0.00391523	0.881131	0.19736
cg02981752	0.0520434	2.89813	0.00391804	0.881131	0.153667
cg25548582	0.148442	2.89802	0.00391962	0.881131	0.519207
cg22732126	0.0598526	2.89799	0.00391969	0.881131	0.146202
cg12824469	0.350692	2.89772	0.003923	0.881131	0.341285
cg14811480	0.0920117	2.8975	0.0039257	0.881131	0.11253
cg04914804	0.769284	2.89744	0.00392715	0.881131	0.318375
cg12742636	-0.170967	-2.89738	0.00392786	0.881131	0.127939
cg03469618	0.0903235	2.89729	0.00392827	0.881131	0.107542
cg25010216	0.0914206	2.89726	0.00392901	0.881131	0.106382
cg10523402	0.104769	2.89735	0.00392989	0.881131	0.283662
cg12604036	-0.284246	-2.89742	0.00393003	0.881131	0.239598
cg18754335	0.0820266	2.89701	0.00393174	0.881131	0.103039
cg05929675	0.0802054	2.89694	0.00393324	0.881131	0.235013
cg21804802	-0.0888888	-2.89688	0.00393335	0.881131	0.176141
cg01821018	0.256853	2.89686	0.00393393	0.881131	0.56557
cg12379175	-0.168093	-2.89668	0.00393589	0.881131	0.345493
cg24770389	-0.536241	-2.89576	0.0039472	0.881131	0.138683
cg04758387	0.0489199	2.89565	0.00394858	0.881131	0.148507
cg27587300	-0.0928987	-2.89566	0.00394871	0.881131	0.210266
cg14202652	0.107473	2.8956	0.00394921	0.881131	0.179352
cg21478180	-0.120025	-2.89556	0.00395006	0.881131	0.264404
cg00278810	0.0823873	2.89525	0.00395352	0.881131	0.161725
cg16502477	0.0470113	2.89515	0.0039548	0.881131	0.268815
cg25409939	-0.148703	-2.89425	0.00396585	0.881131	0.443345
cg14702868	0.0456506	2.89421	0.00396642	0.881131	0.146696
cg02187688	-0.150554	-2.89397	0.00396973	0.881131	0.186928
cg20240230	0.49964	2.89369	0.00397285	0.881131	0.308886
cg21738441	0.240862	2.89368	0.00397295	0.881131	0.109448
cg14586472	0.0728744	2.89343	0.00397643	0.881131	0.146346
cg09079818	0.0740889	2.89335	0.00397711	0.881131	0.168232
cg26795035	-0.233315	-2.89322	0.00397877	0.881131	0.182848
cg27598129	-0.220686	-2.8931	0.00398023	0.881131	0.157105
cg16622061	0.0846609	2.89294	0.00398218	0.881131	0.26898
cg05414165	0.144592	2.89261	0.00398631	0.881131	0.167881
cg12910977	0.130537	2.89271	0.00398643	0.881131	0.379846
cg02108681	0.0638492	2.89257	0.00398681	0.881131	0.339882
cg16718562	-0.0765262	-2.89258	0.00398733	0.881131	0.104963
cg03993991	0.0548316	2.89245	0.00398833	0.881131	0.181692
cg06082962	0.0674207	2.89216	0.00399189	0.881131	0.161277
cg26626370	0.146975	2.89212	0.00399246	0.881131	0.119261
cg13471712	-0.0799546	-2.892	0.003994	0.881131	0.159164
cg10698161	0.161971	2.89178	0.00399664	0.881131	0.132109
cg06184251	0.106421	2.89132	0.00400242	0.881131	0.303703
cg17488052	0.160693	2.89135	0.00400245	0.881131	0.262271
cg01884141	0.149781	2.89118	0.00400426	0.881131	0.222705
cg10977501	0.0922203	2.89113	0.00400647	0.881131	0.284451
cg18170071	0.0881647	2.89102	0.0040066	0.881131	0.210603
cg02909738	0.076242	2.89072	0.0040103	0.881131	0.258991
cg02056997	0.108391	2.8906	0.00401182	0.881131	0.281508
cg19227922	-0.118781	-2.89049	0.0040132	0.881131	0.11258
cg23087306	0.044653	2.89029	0.00401535	0.881131	0.11023
cg02536953	0.076181	2.89026	0.00401581	0.881131	0.27747
cg15291229	-0.209346	-2.89014	0.0040176	0.881131	0.133749
cg15234386	0.584519	2.88996	0.00401947	0.881131	0.202806
cg01908398	0.0588752	2.88996	0.00401951	0.881131	0.206507
cg04563438	0.0609518	2.88991	0.00402016	0.881131	0.117567
cg10030303	0.0483622	2.88982	0.00402156	0.881131	0.165263
cg00000540	-0.0944427	-2.88916	0.00402961	0.881131	0.100301
cg25672398	0.0904033	2.88903	0.00403128	0.881131	0.24606
cg19193931	0.0635797	2.88918	0.00403133	0.881131	0.15375
cg18095041	0.121906	2.88866	0.00403588	0.881131	0.133516
cg27330930	-0.0955982	-2.88862	0.00403639	0.881131	0.15792
cg25793191	-0.188558	-2.8886	0.00403702	0.881131	0.110719
cg04966714	0.0530966	2.88828	0.00404067	0.881131	0.185768
cg07195851	0.115621	2.88818	0.00404193	0.881131	0.306724
cg20483325	-0.0794627	-2.88808	0.00404324	0.881131	0.258047
cg20402664	0.0800875	2.88801	0.00404414	0.881131	0.132134
cg11462764	-0.102158	-2.88791	0.00404567	0.881131	0.123862
cg02653211	0.0831284	2.88782	0.00404654	0.881131	0.227903
cg17102648	0.130312	2.88769	0.00404855	0.881131	0.144343
cg11752927	0.138791	2.88709	0.00405616	0.881131	0.388682
cg20071868	0.100396	2.88698	0.0040571	0.881131	0.232574
cg26125835	0.158596	2.88687	0.00405889	0.881131	0.417425
cg12174129	0.0980715	2.88669	0.00406085	0.881131	0.114744
cg00225221	-0.700074	-2.88667	0.00406279	0.881131	0.230536
cg08489674	0.112885	2.88647	0.00406356	0.881131	0.129304
cg07986019	-0.140366	-2.88648	0.00406381	0.881131	0.168876
cg21674328	-0.0635877	-2.8862	0.00406744	0.881131	0.324122
cg01634388	0.110286	2.88603	0.00406921	0.881131	0.199493
cg03547881	0.0749377	2.88603	0.00406926	0.881131	0.214306
cg14975015	-0.114192	-2.886	0.00406995	0.881131	0.154855
cg11357538	0.0373139	2.8858	0.00407214	0.881131	0.133915
cg23424125	-0.245405	-2.8857	0.00407342	0.881131	0.101574
cg11657184	0.0852032	2.88548	0.00407688	0.881131	0.351466
cg14410991	0.0497068	2.8854	0.00407785	0.881131	0.170222
cg27339031	-0.106958	-2.88536	0.00407911	0.881131	0.302528
cg22693266	0.542658	2.88543	0.00407924	0.881131	0.403751
cg18825101	0.086828	2.88528	0.00407941	0.881131	0.297808
cg09079665	-0.0666142	-2.88503	0.00408196	0.881131	0.102656
cg10405023	0.0541119	2.885	0.00408234	0.881131	0.131342
cg01289103	0.100304	2.88488	0.00408382	0.881131	0.2098
cg04897804	0.0709282	2.8844	0.00409028	0.881131	0.133411
cg26942295	0.107172	2.8843	0.00409161	0.881131	0.222502
cg03724413	0.0488608	2.88399	0.00409523	0.881131	0.190273
cg07612396	0.118271	2.88398	0.00409576	0.881131	0.35504
cg02359855	0.0462902	2.88392	0.00409618	0.881131	0.144647
cg23055772	0.142975	2.88377	0.00409803	0.881131	0.137963
cg19269533	0.174805	2.8837	0.00409896	0.881131	0.16363
cg27026713	0.0568695	2.88368	0.00409919	0.881131	0.178792
cg08233848	0.121483	2.88356	0.00410075	0.881131	0.139616
cg23912081	-0.134104	-2.88353	0.00410111	0.881131	0.304672
cg20263156	0.0654478	2.88344	0.00410223	0.881131	0.153299
cg12757011	0.0558162	2.88336	0.00410334	0.881131	0.173757
cg12570942	-0.182599	-2.88303	0.00410787	0.881131	0.113149
cg12693636	0.112599	2.883	0.00410792	0.881131	0.251859
cg07027444	-0.0654471	-2.88252	0.00411411	0.881131	0.160277
cg05278955	0.0783268	2.88236	0.00411617	0.881131	0.221389
cg27608911	0.258742	2.88245	0.00411775	0.881131	0.12641
cg03189172	0.220511	2.88194	0.00412152	0.881131	0.110672
cg04360546	0.0674547	2.88176	0.00412484	0.881131	0.208481
cg12819207	0.462127	2.88154	0.00412669	0.881131	0.146419
cg09598327	0.0824312	2.88139	0.00412893	0.881131	0.110794
cg02709924	0.0862126	2.88125	0.00413046	0.881131	0.283787
cg26878949	0.135113	2.88026	0.00414353	0.881131	0.274869
cg20416831	-0.110422	-2.87999	0.00414671	0.881131	0.283706
cg21791587	0.0855081	2.87974	0.00414985	0.881131	0.175439
cg05842548	0.049546	2.87939	0.0041551	0.881131	0.141258
cg00036272	0.131356	2.87935	0.00415528	0.881131	0.316506
cg00072587	0.128757	2.87924	0.00415633	0.881131	0.290468
cg17466636	0.150553	2.8788	0.00416214	0.881131	0.15303
cg05296608	0.04521	2.87872	0.00416309	0.881131	0.111054
cg11566832	0.0532633	2.87871	0.00416361	0.881131	0.184908
cg01910948	-0.108077	-2.87871	0.00416432	0.881131	0.434212
cg04891815	-0.100102	-2.87856	0.00416524	0.881131	0.3452
cg13096809	0.061377	2.87849	0.00416613	0.881131	0.146642
cg10142837	-0.0999358	-2.87844	0.00416672	0.881131	0.21841
cg20141227	-0.103069	-2.87822	0.00416959	0.881131	0.212254
cg22887668	0.046293	2.87812	0.00417128	0.881131	0.139681
cg08791268	-0.108395	-2.87814	0.00417135	0.881131	0.145827
cg04904059	0.106551	2.87802	0.00417228	0.881131	0.296284
cg17427836	0.0594735	2.87774	0.00417584	0.881131	0.16087
cg20250162	0.114176	2.87757	0.00417809	0.881131	0.11684
cg02340556	0.0726208	2.87731	0.00418142	0.881131	0.170852
cg01294756	0.142672	2.87723	0.00418247	0.881131	0.156539
cg18849169	0.0659783	2.87722	0.00418305	0.881131	0.174851
cg03237606	0.0770864	2.87719	0.00418307	0.881131	0.114403
cg08663497	-0.0631122	-2.87712	0.00418396	0.881131	0.120982
cg00792008	0.0790018	2.87707	0.00418466	0.881131	0.196304
cg27283030	0.0655415	2.87704	0.00418499	0.881131	0.212717
cg01318188	0.603121	2.87721	0.00418517	0.881131	0.735196
cg06936231	0.136603	2.877	0.00418546	0.881131	0.17808
cg08216491	-0.0979122	-2.87688	0.00418713	0.881131	0.212307
cg01618385	0.0792404	2.87676	0.0041887	0.881131	0.125993
cg26898442	0.0897689	2.87672	0.0041892	0.881131	0.112568
cg24878059	0.0562603	2.87656	0.00419166	0.881131	0.186059
cg22561290	0.133359	2.87647	0.0041928	0.881131	0.106197
cg21494343	0.0718783	2.87617	0.00419637	0.881131	0.170255
cg21411447	0.0725	2.87575	0.00420218	0.881131	0.198959
cg06249486	0.0771025	2.87568	0.00420346	0.881131	0.149008
cg07078529	0.0600607	2.87552	0.00420486	0.881131	0.314631
cg16257029	0.0549634	2.87524	0.00420852	0.881131	0.100127
cg05211862	0.0791217	2.87497	0.00421208	0.881131	0.278082
cg14474183	0.169839	2.87485	0.0042137	0.881131	0.250278
cg21641834	0.175568	2.87471	0.0042155	0.881131	0.117069
cg15408043	-0.0997942	-2.87381	0.00422774	0.881131	0.225862
cg12455053	-0.123124	-2.87373	0.00422834	0.881131	0.145013
cg03654147	-0.25716	-2.87371	0.00422858	0.881131	0.412766
cg08955941	0.0969638	2.87344	0.00423362	0.881131	0.191284
cg15441369	0.045535	2.8732	0.00423538	0.881131	0.14222
cg27168114	0.0699751	2.87289	0.00423941	0.881131	0.132022
cg06991078	0.0729609	2.8728	0.00424059	0.881131	0.131615
cg16303923	-0.138973	-2.87272	0.00424174	0.881131	0.140919
cg23676767	0.137206	2.87243	0.00424557	0.881131	0.281928
cg07750834	0.078887	2.87176	0.00425443	0.881131	0.250439
cg01775492	-0.217537	-2.87171	0.00425503	0.881131	0.131248
cg00424286	0.093748	2.87105	0.00426382	0.881131	0.229039
cg04249993	0.353007	2.87093	0.00426546	0.881131	0.106127
cg02258920	-0.0794923	-2.87087	0.00426614	0.881131	0.107276
cg09322489	-0.137687	-2.87086	0.00426626	0.881131	0.217196
cg01458510	0.155753	2.87082	0.00426789	0.881131	0.164899
cg23537654	0.296868	2.87078	0.00426838	0.881131	0.511713
cg17368336	-0.118265	-2.87055	0.00427046	0.881131	0.238788
cg02798211	-0.256378	-2.87042	0.00427215	0.881131	0.111542
cg20902571	0.10781	2.87042	0.00427222	0.881131	0.101073
cg08092199	0.0422526	2.87037	0.00427317	0.881131	0.128538
cg22690327	0.0456695	2.87024	0.00427463	0.881131	0.212929
cg12021671	0.0429539	2.87003	0.0042773	0.881131	0.168641
cg16531181	-0.123355	-2.86997	0.00427845	0.881131	0.174116
cg09112262	0.0647605	2.8698	0.00428036	0.881131	0.202757
cg21361329	-0.118961	-2.86971	0.00428232	0.881131	0.124498
cg08609839	-0.100727	-2.86967	0.0042825	0.881131	0.240007
cg03875473	0.137854	2.8694	0.0042857	0.881131	0.141558
cg18478353	0.0511183	2.86919	0.00428859	0.881131	0.126747
cg20910807	0.0757199	2.86914	0.00428919	0.881131	0.118889
cg20334115	0.060096	2.86892	0.0042921	0.881131	0.244778
cg26166555	-0.077443	-2.8688	0.00429379	0.881131	0.145618
cg14617280	-0.157218	-2.86879	0.00429393	0.881131	0.103496
cg04902302	0.0886596	2.86857	0.00429681	0.881131	0.11627
cg26730050	-0.130307	-2.86852	0.00429742	0.881131	0.148759
cg05226462	0.0713356	2.86847	0.00429811	0.881131	0.215813
cg00530870	0.0693185	2.86815	0.00430242	0.881131	0.291661
cg24114772	0.214671	2.86814	0.00430262	0.881131	0.1996
cg12718528	-0.189771	-2.86802	0.00430412	0.881131	0.109318
cg17749033	0.0402549	2.86795	0.00430505	0.881131	0.160145
cg19200319	-0.0961071	-2.86794	0.0043053	0.881131	0.113709
cg06250364	-0.165676	-2.86793	0.00430537	0.881131	0.12538
cg18177183	0.214564	2.86774	0.00430788	0.881131	0.470843
cg19220838	0.09028	2.86772	0.00430818	0.881131	0.137962
cg21065856	0.0872061	2.86748	0.00431146	0.881131	0.174057
cg01832325	-0.10585	-2.86733	0.0043134	0.881131	0.21621
cg25249422	0.137867	2.86704	0.00431736	0.881131	0.176104
cg24523371	0.0625107	2.86701	0.00431807	0.881131	0.25235
cg15994683	0.119229	2.86653	0.00432421	0.881131	0.305949
cg22729821	0.0583981	2.86644	0.00432542	0.881131	0.229071
cg10446465	0.0690227	2.8662	0.00432853	0.881131	0.17886
cg25507885	0.0999787	2.86612	0.00432971	0.881131	0.322286
cg07332971	0.0882168	2.86626	0.0043299	0.881131	0.146098
cg10492511	0.111243	2.86602	0.00433102	0.881131	0.148258
cg22309910	-0.127306	-2.86604	0.00433106	0.881131	0.136115
cg10351284	0.120672	2.86536	0.00433988	0.881131	0.101971
cg05609160	0.083961	2.86494	0.00434555	0.881131	0.269565
cg17766560	-0.0846226	-2.86458	0.00435144	0.881131	0.10433
cg11153256	0.106445	2.86428	0.00435442	0.881131	0.331899
cg21622103	-0.10418	-2.86405	0.00435759	0.881131	0.103336
cg15460802	-0.0867404	-2.86381	0.0043609	0.881131	0.103023
cg04602454	0.0852108	2.86365	0.00436308	0.881131	0.229938
cg02482718	-0.0815851	-2.86364	0.00436317	0.881131	0.236681
cg16560770	-0.129043	-2.86346	0.004366	0.881131	0.123336
cg23581173	-0.173291	-2.86318	0.00436973	0.881131	0.161221
cg20238678	0.0724293	2.86292	0.00437292	0.881131	0.217314
cg18627764	-0.0857862	-2.86294	0.00437302	0.881131	0.182491
cg16668903	-0.0817876	-2.86287	0.00437359	0.881131	0.111623
cg09657118	0.377269	2.86414	0.00437376	0.881131	0.543717
cg08634464	-0.38823	-2.86292	0.00437472	0.881131	0.351398
cg17566002	-0.098038	-2.86275	0.00437596	0.881131	0.143802
cg11848390	0.0968129	2.86267	0.00437635	0.881131	0.238069
cg24788838	0.0544361	2.86254	0.00437813	0.881131	0.19265
cg24965538	0.160535	2.86223	0.0043823	0.881131	0.237079
cg25063538	0.0918482	2.86211	0.00438389	0.881131	0.204513
cg06972843	-0.977789	-2.86187	0.00438761	0.881131	0.951129
cg12642651	-0.0780053	-2.86172	0.00438917	0.881131	0.101408
cg07719965	-0.246004	-2.8617	0.00438951	0.881131	0.248172
cg08022436	0.0843586	2.86155	0.00439157	0.881131	0.12356
cg05635233	0.125756	2.86096	0.00439961	0.881131	0.156589
cg08161546	0.158336	2.86016	0.00441095	0.881131	0.469653
cg12943317	0.848679	2.86061	0.00441251	0.881131	0.151915
cg23342872	0.900837	2.86087	0.00441409	0.881131	0.181413
cg25683495	0.106773	2.85982	0.00441522	0.881131	0.250875
cg23999839	0.0923299	2.85976	0.00441607	0.881131	0.300736
[truncated: 400,608+ more rows]
