# Supplementary material for: An epigenome-wide association study of posttraumatic stress disorder in US veterans implicates several new DNA methylation loci
Source: Clin Epigenetics. 2020 Mar 14;12:46. doi: 10.1186/s13148-020-0820-0 (PMC7071645; doi:10.1186/s13148-020-0820-0)
Supplement: Supplementary file 3 — Additional file 3. Replication of top EWAS resultsin the PFC of the Brain Bank Cohort. [file 13148_2020_820_MOESM3_ESM.xlsx]

## Sheet: TRACTSPP_Trim_LTPTSD_EWAS_SmoSa
		Discovery Cohort Results				Brain Bank Cohort Results
Gene	ID	logFC	t	P-value	Padj	Estimate	SE	T	P-value	Padj
G0S2	cg19534438	0.337358	5.37223	1.19175e-07	0.0479698	-0.00385964	0.162748	-0.0237155	0.98108	0.987886
BBS9	cg20152234	0.183316	4.82838	1.82981e-06	0.279897	-0.00282695	0.119988	-0.0235603	0.981203	0.987886
	cg11504264	0.23778	4.80122	2.08611e-06	0.279897	0.0181984	0.104761	0.173714	0.862108	0.987886
	cg08000207	-0.345589	-4.55311	6.63965e-06	0.597792	0.0555812	0.119848	0.463763	0.642941	0.945502
AHRR	cg05575921	-0.133674	-4.48206	9.16486e-06	0.597792	-0.0312207	0.0614622	-0.507966	0.611796	0.929744
RCCD1	cg25526519	-0.162365	-4.47039	9.65899e-06	0.597792	0.0234365	0.0672509	0.348493	0.727585	0.980562
NCK1	cg09423651	-0.526686	-4.43563	1.1292e-05	0.597792	-0.0578925	0.0911225	-0.635326	0.525776	0.888374
CHST11	cg04130728	0.154412	4.42432	1.18811e-05	0.597792	0.316915	0.0841653	3.76539	0.000321239	0.0321239
TMLHE	cg12115116	0.252073	4.36655	1.53419e-05	0.677004	-0.20282	0.182821	-1.10939	0.269402	0.77835
	cg20974659	0.113785	4.34565	1.68193e-05	0.677004	-0.0702669	0.0499328	-1.40723	0.162201	0.676546
	cg25017774	0.150044	4.29802	2.07035e-05	0.694527	0.00272983	0.0585466	0.0466266	0.962811	0.987886
CREB5	cg11316904	0.130329	4.28007	2.23818e-05	0.694527	0.0252878	0.0611033	0.413853	0.679161	0.953594
	cg18103582	0.119193	4.27039	2.33403e-05	0.694527	-0.0808717	0.0711129	-1.13723	0.257552	0.77835
EPB41L1	cg12165383	-0.146147	-4.25261	2.5212e-05	0.694527	-0.0409161	0.101349	-0.403715	0.686588	0.953594
FUNDC2	cg17758583	0.821498	4.23048	2.77297e-05	0.694527	-0.686754	0.377625	-1.81861	0.0722576	0.656888
	cg26727817	0.15055	4.22875	2.79354e-05	0.694527	-0.0499267	0.0667175	-0.74833	0.455123	0.881222
ERI3	cg12590902	0.0896577	4.21729	2.93329e-05	0.694527	0.0679451	0.0526439	1.29065	0.199402	0.712152
SLC22A23	cg05774234	0.114467	4.17826	3.46438e-05	0.774705	0.0297408	0.0872583	0.340836	0.733279	0.980562
	cg02123616	-0.105059	-4.13961	4.0811e-05	0.864583	-0.0451989	0.0739218	-0.611442	0.541421	0.888374
F9	cg03155646	-0.431061	-4.12631	4.31751e-05	0.868934	0.271426	0.133555	2.03232	0.0451328	0.656888
	cg02591280	-0.115813	-4.09089	5.00478e-05	0.871452	0.0663939	0.067182	0.988269	0.32469	0.791926
SERPINB9P1	cg11678426	0.147289	4.08585	5.11106e-05	0.871452	0.105076	0.0540497	1.94406	0.0549721	0.656888
C12orf34	cg02742775	0.0876684	4.08254	5.18197e-05	0.871452	-0.119637	0.058123	-2.05834	0.0424632	0.656888
TRAPPC3L;FAM26D	cg00681376	-0.466694	-4.04608	6.02842e-05	0.871452	-0.0667034	0.0814114	-0.819337	0.413663	0.881222
TBX15	cg08857095	0.112855	4.02824	6.50181e-05	0.871452	0.0394324	0.0530136	0.743818	0.458235	0.881222
THOC2	cg05548158	-0.168356	-4.0188	6.75175e-05	0.871452	0.00186505	0.0836822	0.0222873	0.982219	0.987886
PRKG2	cg12977791	-0.247311	-4.01419	6.87686e-05	0.871452	0.12282	0.139242	0.882061	0.379058	0.864074
MAP2	cg13255083	0.148048	4.01128	6.95753e-05	0.871452	-0.16959	0.120539	-1.40693	0.162371	0.676546
TTLL9	cg03061612	0.081483	4.00989	6.99938e-05	0.871452	0.0945592	0.0650006	1.45474	0.148828	0.676546
CMTM4	cg03388121	0.0879607	4.00695	7.08221e-05	0.871452	0.101627	0.0702607	1.44643	0.150985	0.676546
TLX1	cg04273871	0.0787312	4.00619	7.10445e-05	0.871452	-0.0722443	0.0495197	-1.4589	0.147611	0.676546
	cg14567963	0.191055	3.99836	7.33612e-05	0.871452	-0.0100865	0.0616796	-0.163531	0.870112	0.987886
CRTC3-AS1	cg05746708	-0.164547	-3.99676	7.38403e-05	0.871452	0.177711	0.10742	1.65435	0.0996458	0.670771
SLC22A23	cg25373054	-0.255359	-3.97041	8.22229e-05	0.871452	0.0238308	0.111929	0.21291	0.83143	0.987886
SLC45A4	cg25491333	0.113958	3.9684	8.28982e-05	0.871452	0.0533892	0.0932072	0.572801	0.56724	0.914903
OR2AG1	cg12186981	1.11781	3.96261	8.48729e-05	0.871452	-1.14971	0.532279	-2.15997	0.0334906	0.656888
LOC285696	cg23987134	0.0934995	3.95317	8.8186e-05	0.871452	-0.0110951	0.0469661	-0.236236	0.813283	0.987886
	cg23487517	-0.139619	-3.94925	8.9601e-05	0.871452	0.0200247	0.0853348	0.23466	0.814506	0.987886
DHRS13	cg08612384	0.081634	3.9438	9.15973e-05	0.871452	0.040097	0.061053	0.656758	0.511986	0.888374
SLC24A3	cg03111560	0.508902	3.94148	9.24863e-05	0.871452	-0.0384685	0.056565	-0.680075	0.496802	0.888374
APBA1	cg06826552	-0.148838	-3.93661	9.43004e-05	0.871452	0.127915	0.128053	0.998926	0.31959	0.791926
	cg05988342	-0.158633	-3.93538	9.47927e-05	0.871452	0.107392	0.140813	0.762653	0.446636	0.881222
	cg15874302	0.121469	3.93309	9.57481e-05	0.871452	0.0554007	0.0412179	1.34409	0.181721	0.698926
PRDM16	cg08405558	0.07826	3.93196	9.60865e-05	0.871452	0.0397987	0.0640981	0.620903	0.535209	0.888374
	cg06498964	-0.132819	-3.90465	0.00010725	0.871452	-0.209815	0.143601	-1.4611	0.146961	0.676546
LOC101926941	cg14815675	0.0866628	3.89606	0.000111062	0.871452	-0.0232638	0.10429	-0.223067	0.823513	0.987886
	cg07566568	-0.0991188	-3.89345	0.000112173	0.871452	-0.0348057	0.0570282	-0.610324	0.541908	0.888374
	cg27459803	0.0725731	3.86799	0.00012423	0.871452	-0.113546	0.0967088	-1.1741	0.2426	0.758125
CLDN11	cg06023994	0.090744	3.8648	0.000125756	0.871452	-0.0983813	0.0568476	-1.73061	0.0867532	0.667332
	cg12949633	0.136391	3.85913	0.000128622	0.871452	0.118653	0.087578	1.35482	0.178208	0.698926
ALDH8A1	cg12491555	0.255254	3.84835	0.000134244	0.871452	0.0117785	0.129844	0.0907126	0.927724	0.987886
OSMR;OSMR-AS1	cg19758087	0.142479	3.84267	0.000137301	0.871452	0.0192995	0.0990166	0.194912	0.845627	0.987886
	cg02489143	-0.362103	-3.83785	0.000139947	0.871452	0.0564687	0.0845816	0.667624	0.505056	0.888374
FAM150B	cg02736505	0.0897596	3.83012	0.000144317	0.871452	-0.112228	0.0644513	-1.74128	0.084816	0.667332
STK39	cg08487618	0.121445	3.82969	0.000144563	0.871452	-0.110084	0.0704923	-1.56164	0.121485	0.674915
SGK2	cg15370163	0.145112	3.82515	0.000147142	0.871452	0.033659	0.0614873	0.547414	0.584487	0.927757
	cg03024251	-0.102197	-3.82062	0.000149827	0.871452	-0.0057118	0.0405414	-0.140888	0.887968	0.987886
	cg06659926	-0.558826	-3.79835	0.000163532	0.871452	-0.0531845	0.163616	-0.325057	0.745227	0.980562
PFDN4	cg22154859	-0.101936	-3.78611	0.000171517	0.871452	0.0503092	0.0662328	0.759581	0.447959	0.881222
ZBTB2	cg12995384	0.209531	3.78524	0.000172103	0.871452	-0.0117673	0.0659469	-0.178436	0.858395	0.987886
PRKCB	cg18483526	0.0851282	3.7848	0.000172399	0.871452	0.0359293	0.0480278	0.748093	0.455301	0.881222
ABCB4	cg17212350	0.336003	3.78391	0.000173005	0.871452	0.335407	0.328727	1.02032	0.309316	0.791926
	cg02890235	0.877047	3.78443	0.000173747	0.871452	-0.0583304	0.656185	-0.0888932	0.929168	0.987886
	cg19999521	0.0982959	3.78265	0.000173853	0.871452	0.11999	0.065641	1.82798	0.0707273	0.656888
PHACTR1	cg19686983	-0.147672	-3.78203	0.000174276	0.871452	-0.310696	0.140525	-2.21097	0.0296529	0.656888
TESC	cg01363734	0.162798	3.78146	0.000174667	0.871452	-0.0692252	0.097412	-0.710643	0.478073	0.888374
GPR133	cg11051095	-0.22026	-3.77698	0.000177744	0.871452	0.0968741	0.100011	0.968635	0.33428	0.795906
UGT2A1	cg06634441	-0.158614	-3.76979	0.0001828	0.871452	-0.15754	0.0856165	-1.84007	0.0691571	0.656888
BCL11B	cg07951674	0.106885	3.7673	0.000184578	0.871452	-0.00497085	0.0676081	-0.0735245	0.94139	0.987886
	cg17878139	-0.0917451	-3.7641	0.000186892	0.871452	0.0750972	0.0462079	1.6252	0.107323	0.670771
CAMKK2	cg27648619	0.098032	3.76003	0.000189879	0.871452	-0.0138944	0.0494944	-0.280726	0.778982	0.987886
TRIM26	cg12600843	-0.11394	-3.75622	0.000192707	0.871452	-0.00961942	0.0642946	-0.149615	0.881074	0.987886
FBXL7	cg11339964	0.110093	3.75013	0.00019732	0.871452	0.143955	0.0606284	2.37438	0.0198545	0.656888
	cg18735542	0.142064	3.7475	0.000199381	0.871452	-0.0377839	0.0727002	-0.519722	0.603427	0.929744
DTNBP1	cg26878947	0.0663236	3.74602	0.000200484	0.871452	0.0475206	0.0993142	0.478487	0.632578	0.944146
	cg16176766	-0.148176	-3.74528	0.000201368	0.871452	0.10075	0.123607	0.815077	0.415565	0.881222
	cg20985852	0.110832	3.74466	0.000201587	0.871452	-0.212396	0.109906	-1.93251	0.056587	0.656888
	cg04751358	-0.501313	-3.74271	0.000203704	0.871452	0.0018266	0.120285	0.0151857	0.987886	0.987886
	cg04363755	0.0755006	3.74001	0.000205206	0.871452	0.0523309	0.059471	0.879941	0.380193	0.864074
C22orf41	cg12017894	-0.0956833	-3.73822	0.00020699	0.871452	-0.10907	0.0671531	-1.62419	0.105937	0.670771
ARAF	cg26803955	-0.3324	-3.73813	0.000207064	0.871452	-0.0625957	0.14111	-0.443597	0.657615	0.953066
OR5AP2	cg23827421	0.920311	3.73229	0.000211474	0.871452	0.496619	0.458033	1.08424	0.280206	0.77835
ME3	cg22090055	0.251716	3.72803	0.000214929	0.871452	-0.107098	0.0892663	-1.19976	0.232551	0.75378
	cg11706129	-0.234575	-3.72472	0.000218403	0.871452	-0.307883	0.237731	-1.29509	0.197746	0.712152
IGSF9	cg06974143	0.25198	3.71881	0.000222709	0.871452	0.0120246	0.03578	0.33607	0.736915	0.980562
	cg06792417	0.0785334	3.71822	0.000223215	0.871452	-0.0678734	0.0560673	-1.21057	0.228532	0.75378
NANOS1	cg19049569	-0.273459	-3.71576	0.000225342	0.871452	0.0271195	0.195279	0.138876	0.889557	0.987886
APBA2	cg27184903	0.0638448	3.71409	0.000226789	0.871452	0.0121139	0.05093	0.237854	0.812032	0.987886
RPTOR	cg14406501	-0.36892	-3.70915	0.000231145	0.871452	-0.236188	0.215921	-1.09387	0.275985	0.77835
	cg25490693	0.0950534	3.70904	0.000231237	0.871452	0.00159481	0.0628773	0.0253639	0.979765	0.987886
EXOC6B	cg19961648	0.257442	3.70778	0.000232608	0.871452	-0.101635	0.102038	-0.996055	0.320055	0.791926
EBF3	cg02449166	0.0930739	3.70619	0.000233785	0.871452	-0.00386989	0.0657373	-0.0588689	0.953057	0.987886
	cg04741920	-0.14244	-3.70584	0.000234152	0.871452	0.184969	0.11696	1.58147	0.116898	0.674915
ZNF334	cg19234014	0.124191	3.7029	0.00023686	0.871452	0.0598939	0.0908502	0.65926	0.510361	0.888374
	cg04237246	-0.306732	-3.69979	0.000239648	0.871452	0.106839	0.0892401	1.19721	0.233672	0.75378
B3GNTL1	cg20198923	0.121938	3.6967	0.000242454	0.871452	-0.0108147	0.073157	-0.147828	0.882486	0.987886
	cg00312944	0.149453	3.69558	0.000243546	0.871452	-0.0331901	0.0656794	-0.505335	0.613631	0.929744
	cg26096190	0.116635	3.69518	0.000243872	0.871452	0.0614193	0.0618863	0.992454	0.322607	0.791926
OSBPL6	cg19004019	0.635825	3.69108	0.000248137	0.871452	-0.280571	0.341319	-0.82202	0.411621	0.881222
	cg15223080	0.771652	3.68615	0.00025245	0.871452	-0.108526	0.267589	-0.405568	0.685226	0.953594
